# Supplementary material for: A practical and cost-effective approach to polysubstituted pyrimidine derivativesviaDBU mediated redox isomerization of propargyl alcohol and subsequent N–C–N fragment condensation
Source: Royal Society of Chemistry journal article supplement (doi:10.1039/d2nj00586g), 2022-01-01
Supplement: d2nj00586g1.pdf [file d2nj00586g1.pdf]

## **A practical and cost-effective approach to polysubstituted pyrimidine derivatives via DBU mediated redox isomerization of propargyl alcohol and subsequent N-C-N fragment condensation**

Rimpa De,<sup>a</sup> Utsav Sengupta,<sup>a</sup> Antony Savarimuthu,<sup>b</sup> Souvik Misra<sup>a</sup>, Jayanta Nanda<sup>c</sup> and Mrinal K. Bera<sup>a\*</sup>

<sup>a</sup>Department of Chemistry, Indian Institute of Engineering Science and Technology (IIEST), Shibpur, PO- Botanic Garden, Howrah- 711 103 (WB), India

<sup>b</sup>Department of Chemistry, St. Xavier's College (Autonomous), Palayamkottai, Tamil Nadu-627 002, India

<sup>c</sup>Department of Chemistry, University of North Bengal, Darjeeling-734013, West Bengal, India

\* Email: [mrinalkbera26@gmail.com](mailto:mrinalkbera26@gmail.com)

*Supporting information*

**Table of content**

- NMR spectra of pyrimidine 3-22
- NMR spectra of 2-amino pyrimidine 23-28
- Crystallographic data analysis of compound **3o** 29

**<sup>1</sup>H NMR (400 MHz) of 2, 4, 6-triphenylpyrimidine (3a):**

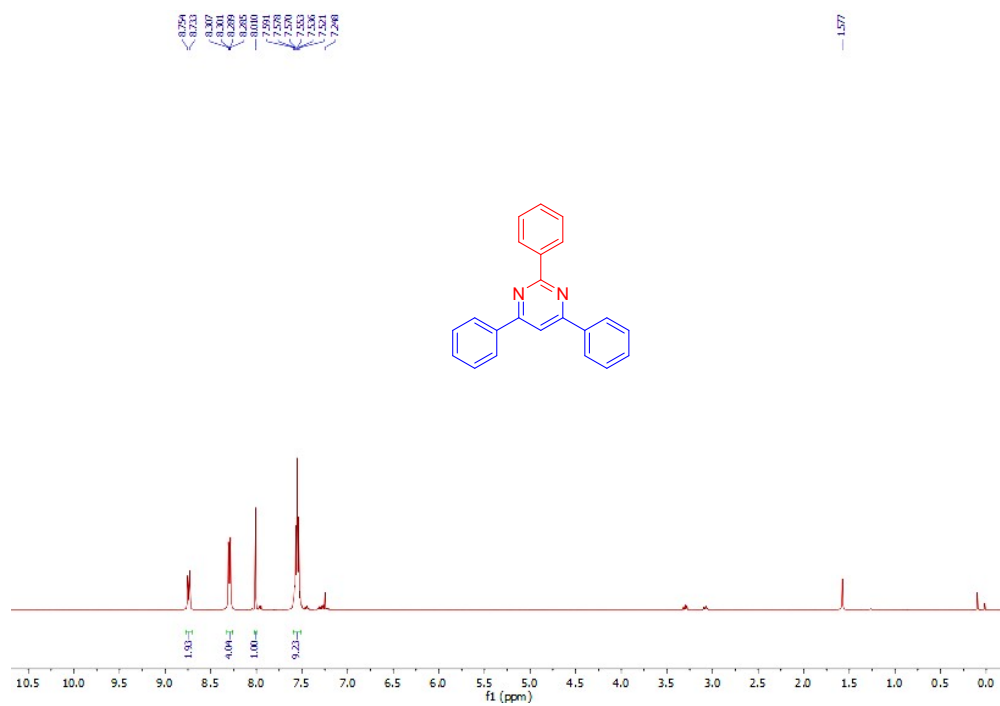

**<sup>13</sup>C NMR (100 MHz) of 2, 4, 6-triphenylpyrimidine (3a):**

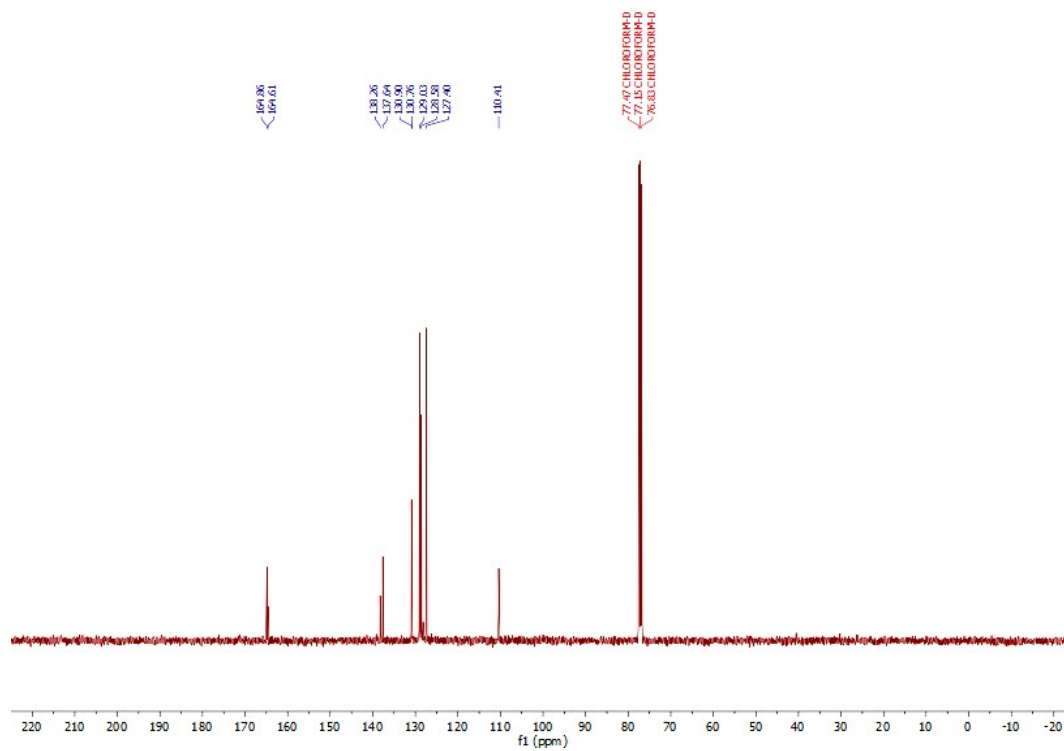

**<sup>1</sup>H NMR (400 MHz) of 2, 4-diphenyl-6-(p-tolyl)pyrimidine (3b):**

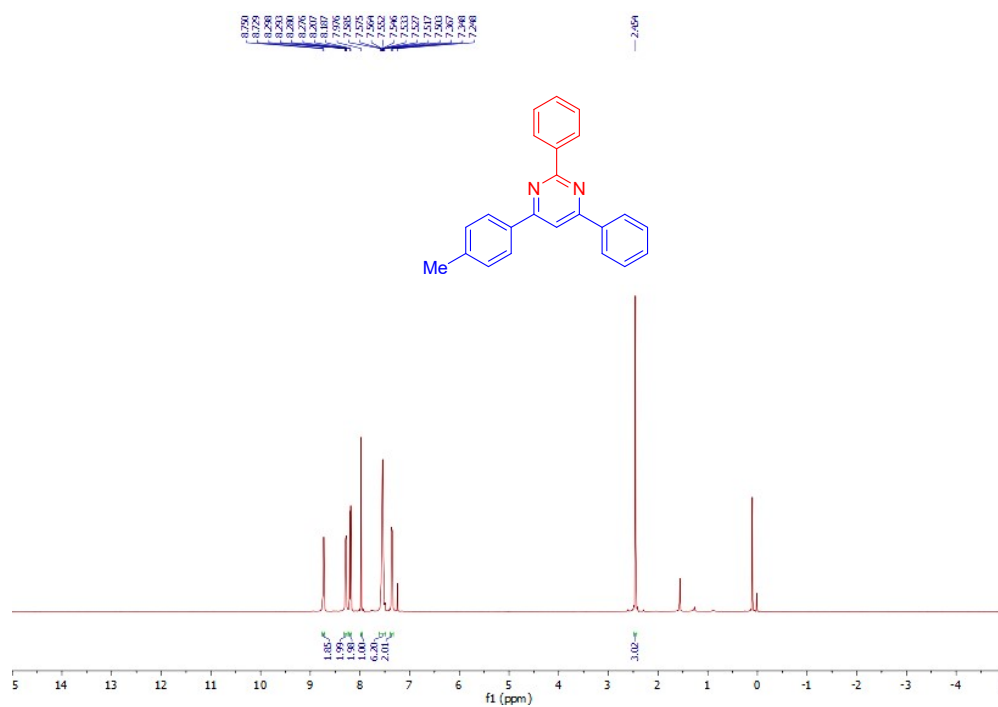

**<sup>13</sup>C NMR (100 MHz) of 2, 4-diphenyl-6-(p-tolyl) pyrimidine (3b):**

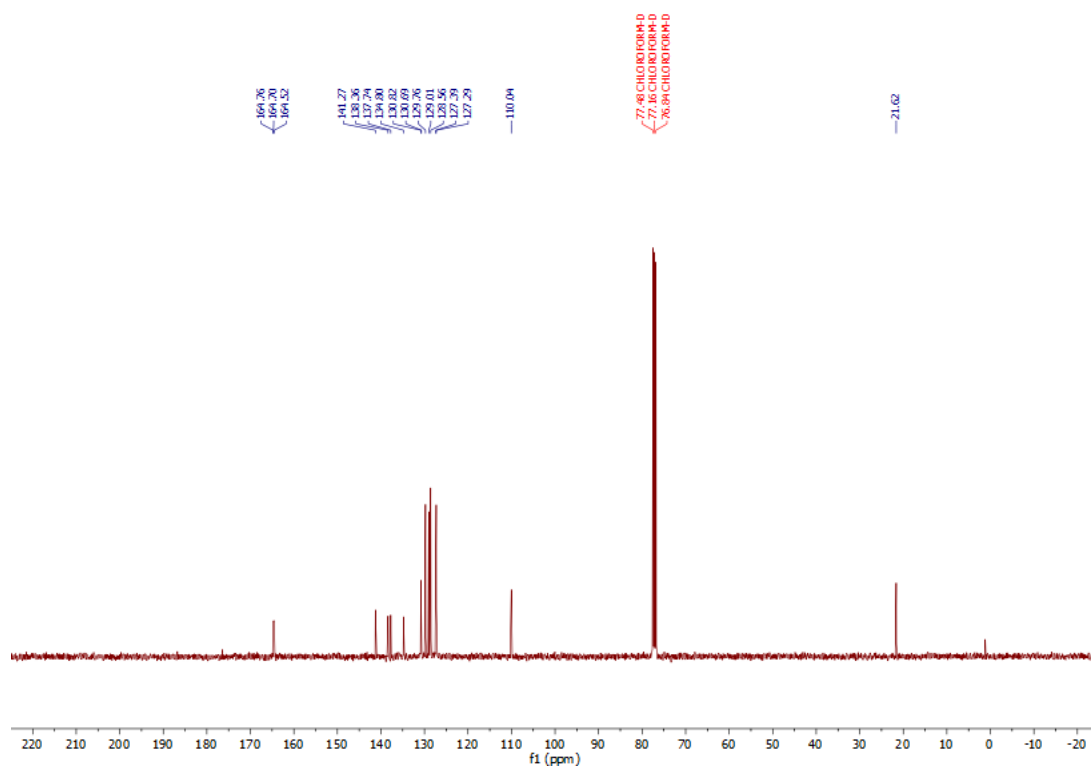

**<sup>1</sup>H NMR (400 MHz) of 2, 4-diphenyl-6-(m-tolyl) pyrimidine (3c):**

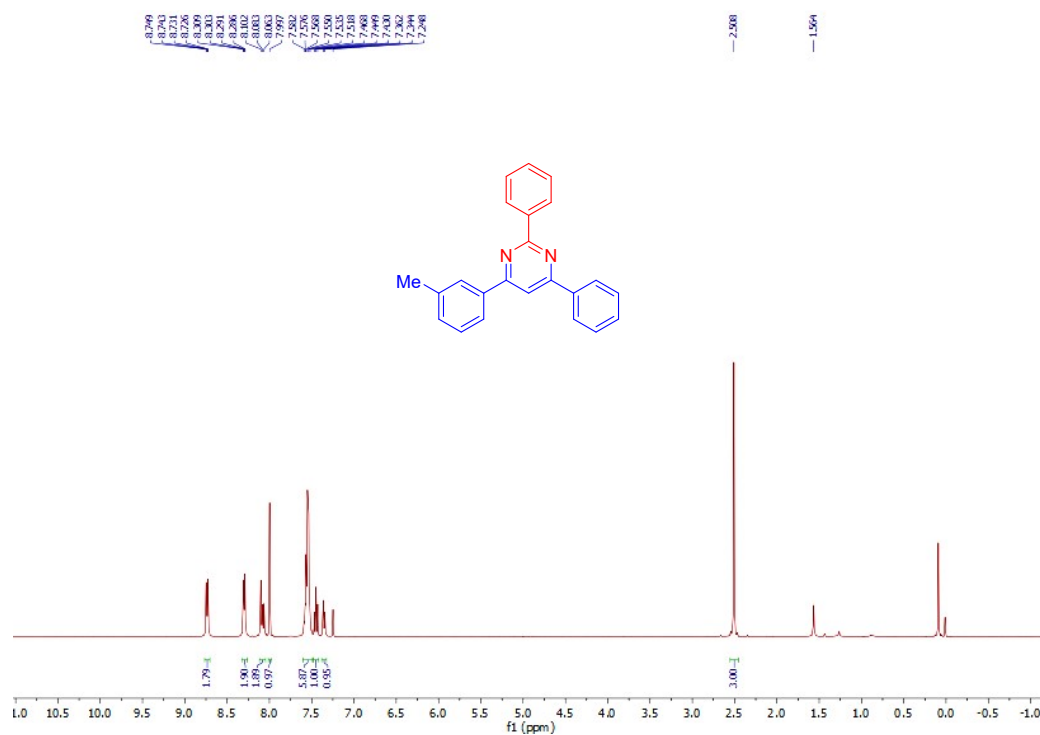

**<sup>13</sup>C NMR (100 MHz) of 2, 4-diphenyl-6-(m-tolyl) pyrimidine (3c):**

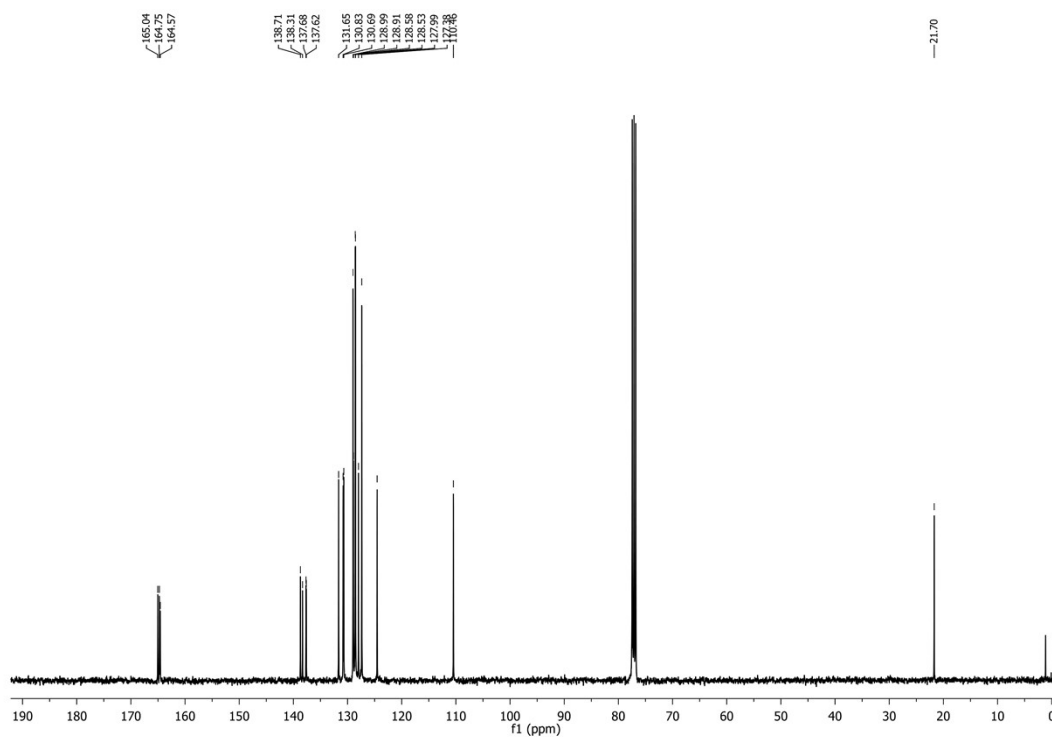

**<sup>1</sup>H NMR (400 MHz) of 4-(4-ethylphenyl)-2,6-diphenylpyrimidine (3d):**

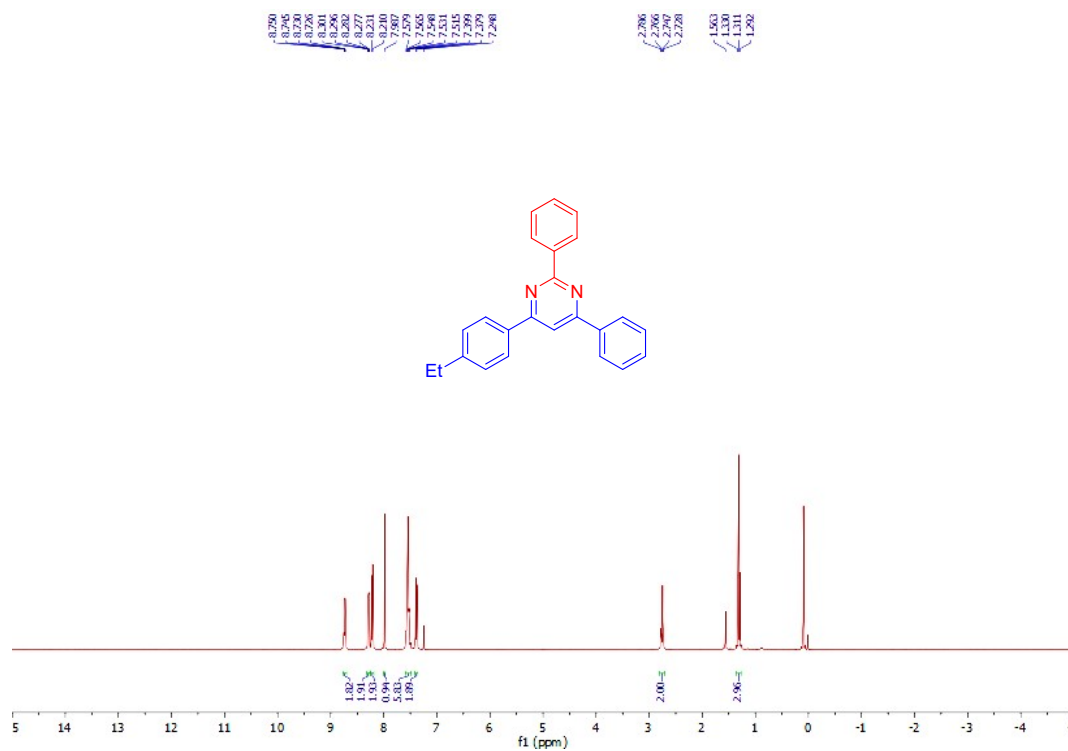

**<sup>13</sup>C NMR (100 MHz) of 4-(4-ethylphenyl)-2,6-diphenylpyrimidine (3d):**

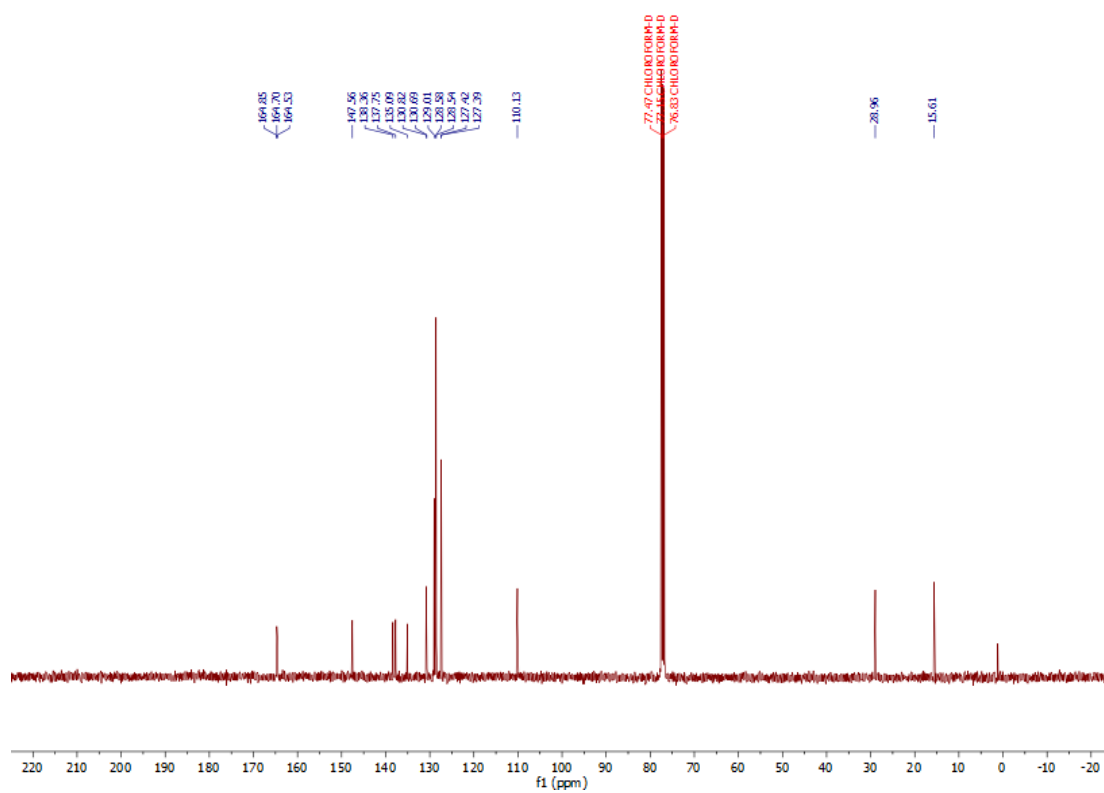

**<sup>1</sup>H NMR (400 MHz) of 4-(4-isopropylphenyl)-2,6-diphenylpyrimidine (3e):**

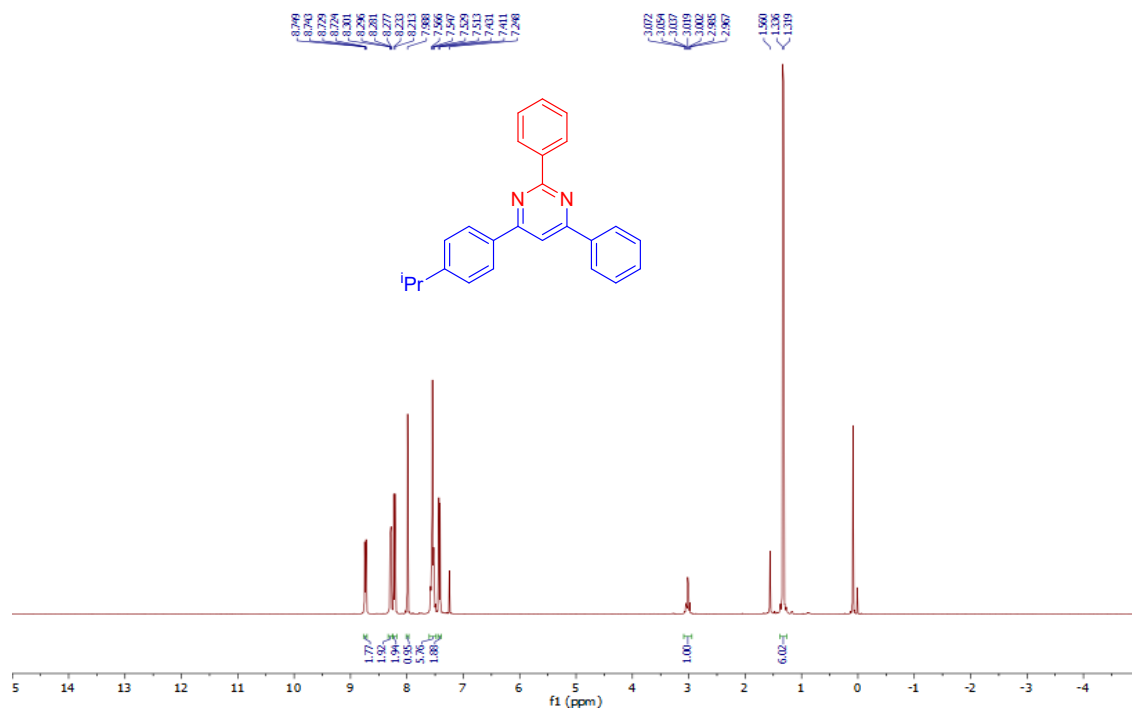

**<sup>13</sup>C NMR (100 MHz) of 4-(4-isopropylphenyl)-2,6-diphenylpyrimidine (3e):**

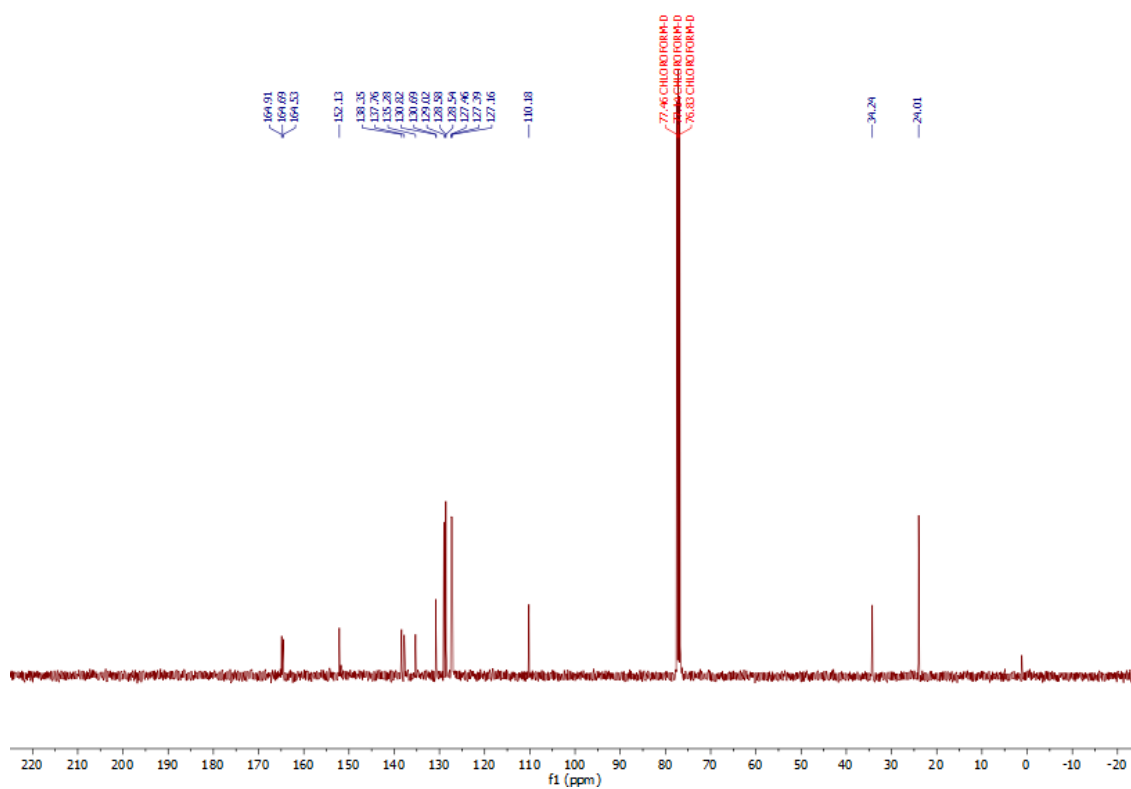

**<sup>1</sup>H NMR (400 MHz) of 4-(4-(tert-butyl)phenyl)-2,6-diphenylpyrimidine (3f):**

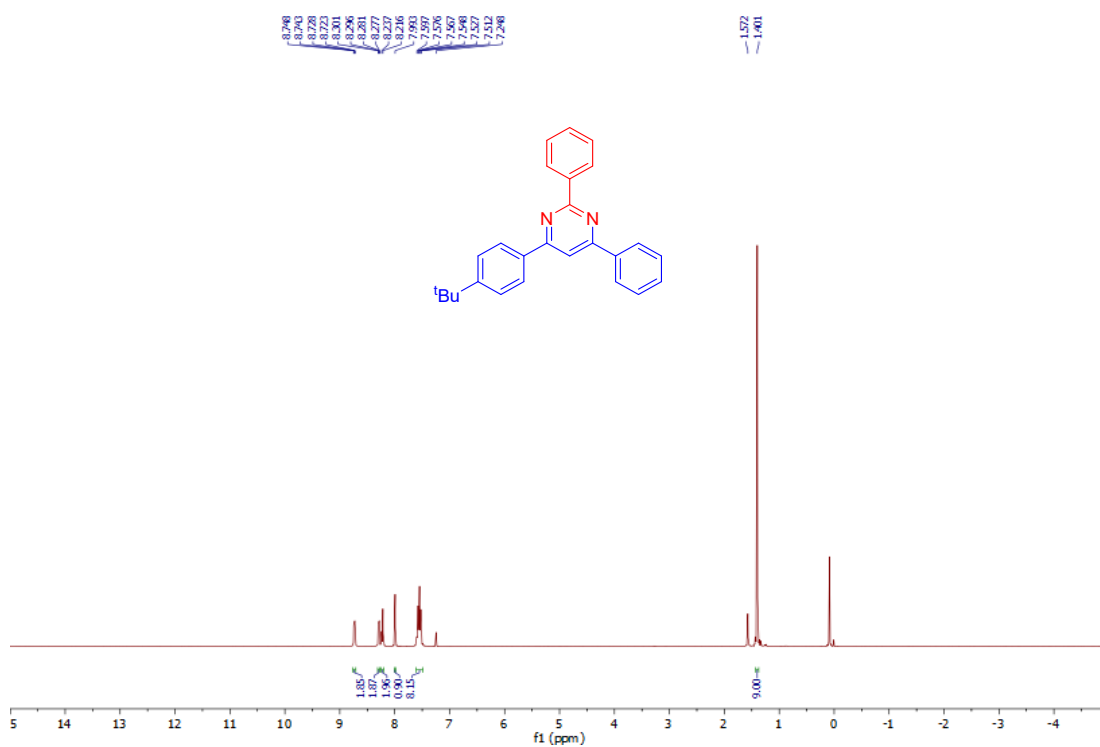

**<sup>13</sup>C NMR (100 MHz) of 4-(4-(tert-butyl) phenyl)-2,6-diphenylpyrimidine (3f):**

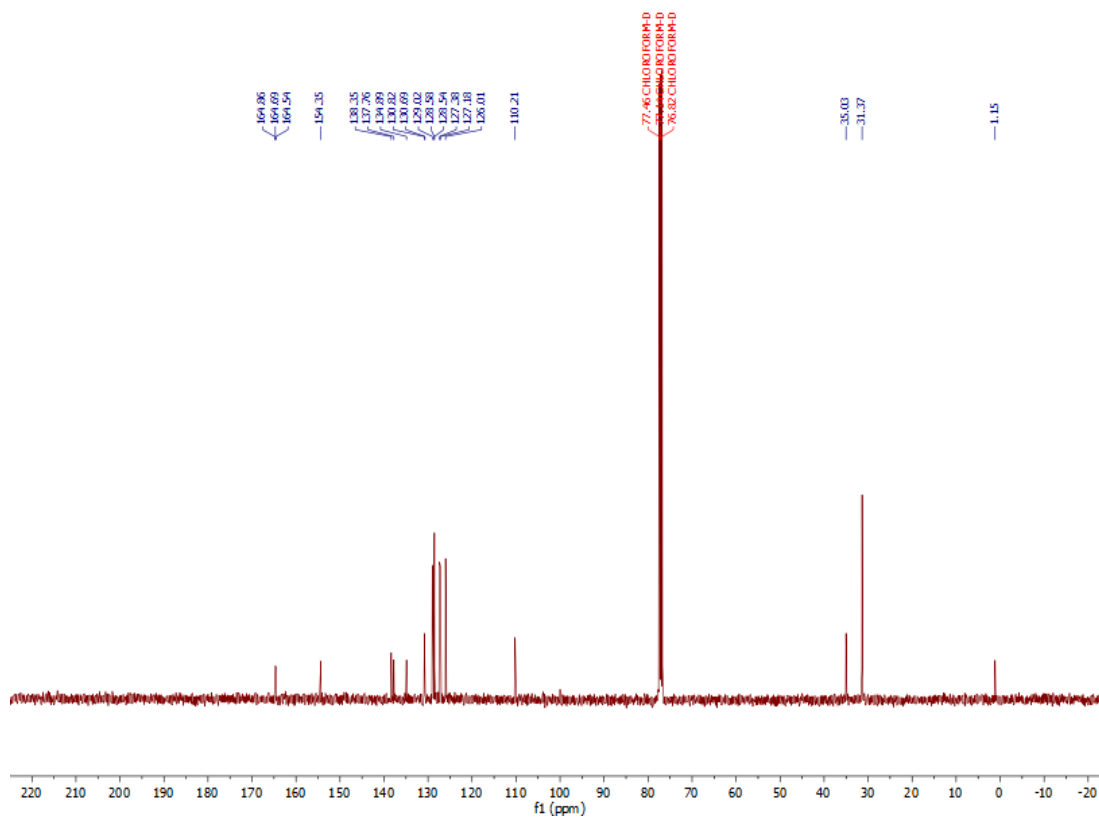





**<sup>1</sup>H NMR (400 MHz) of 4-(3-methoxyphenyl)-2,6-diphenylpyrimidine (3h):**

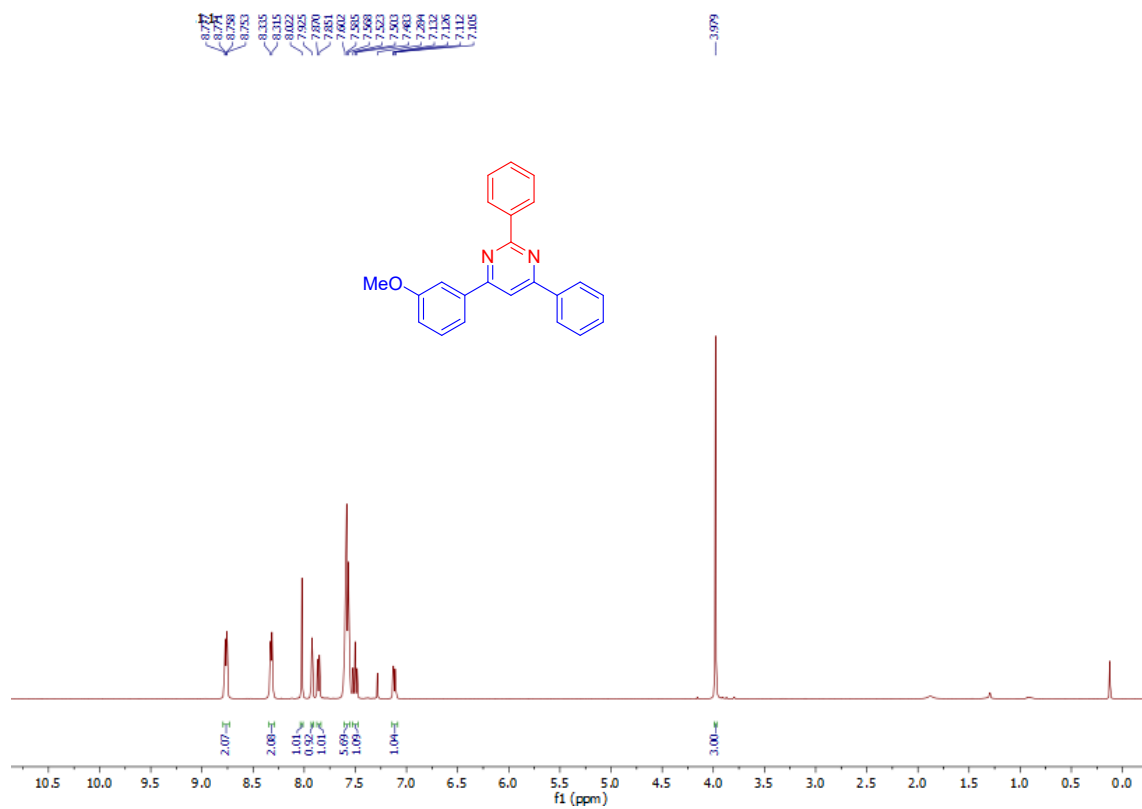

**<sup>13</sup>C NMR (100 MHz) of 4-(3-methoxyphenyl)-2,6-diphenylpyrimidine (3h):**

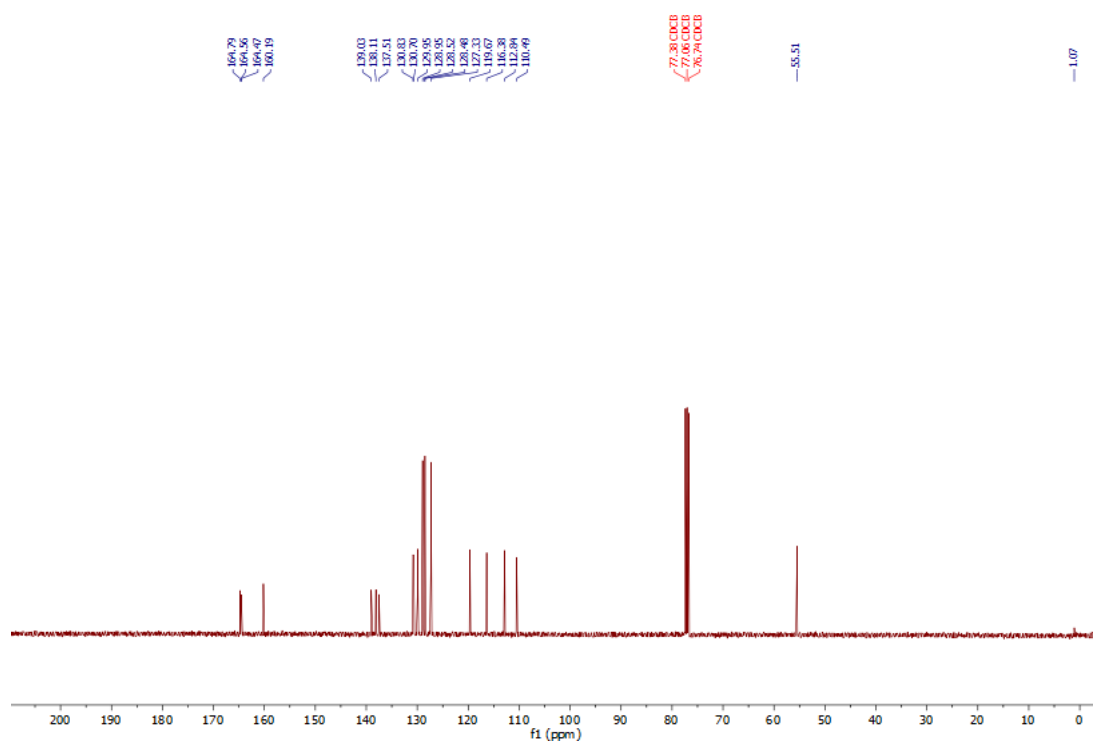

**<sup>1</sup>H NMR (400 MHz) of 4-(2,5-dimethoxyphenyl)-2,6-diphenylpyrimidine (3i):**

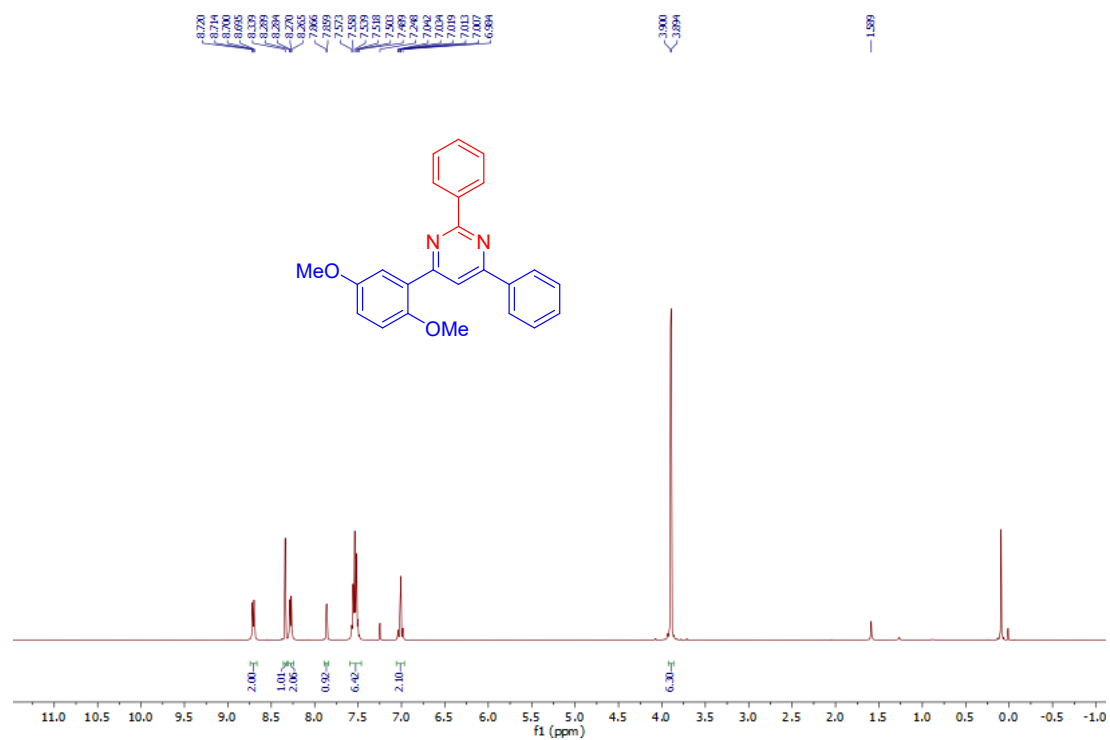

**<sup>13</sup>C NMR (100 MHz) of 4-(2,5-dimethoxyphenyl)-2,6-diphenylpyrimidine (3i):**

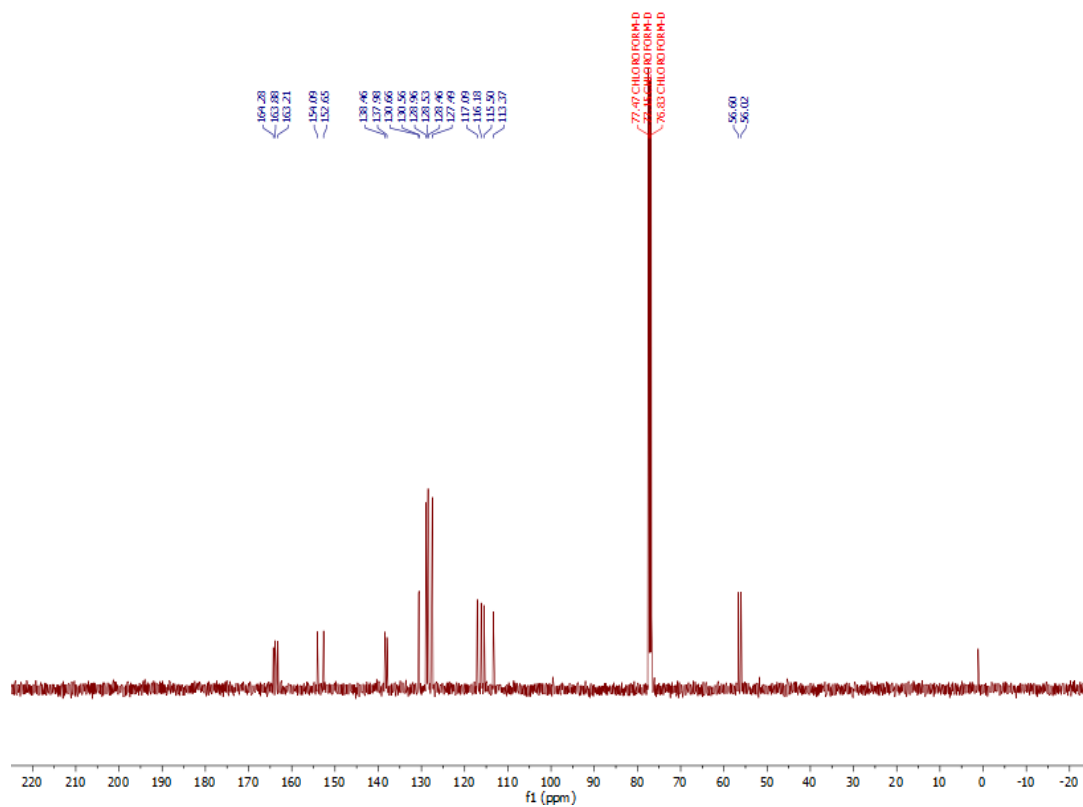

**<sup>1</sup>H NMR (400 MHz) of 4-(4-fluorophenyl)-2,6-diphenylpyrimidine (3j):**

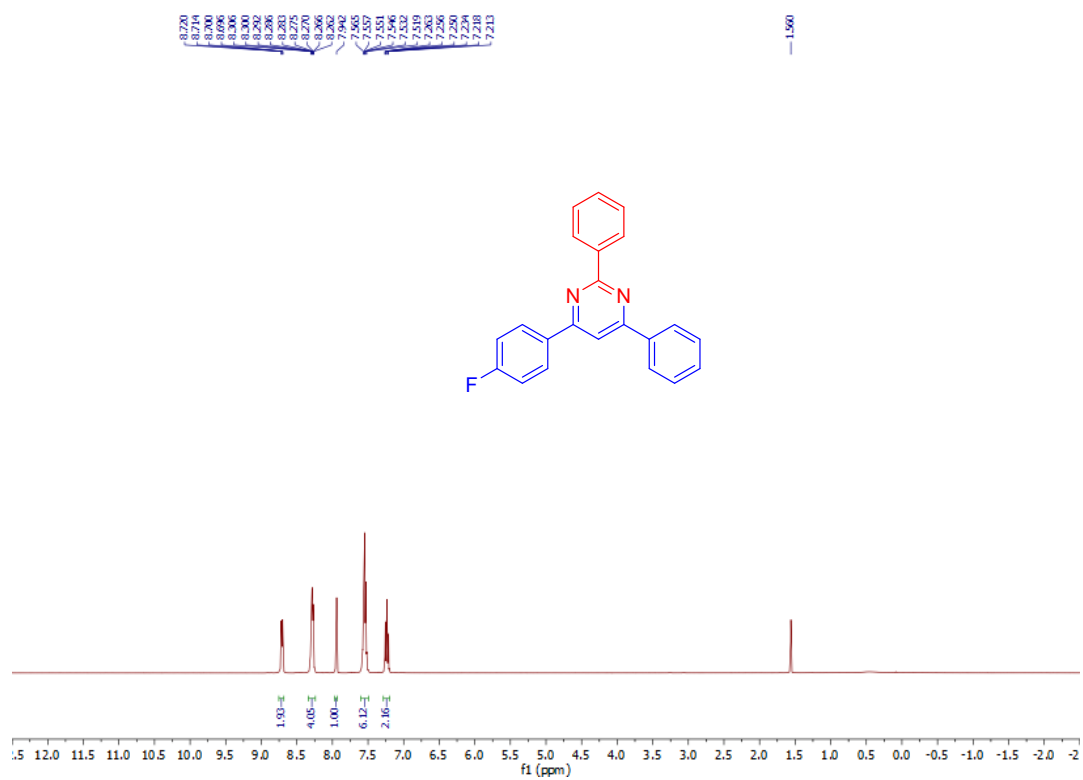

**<sup>13</sup>C NMR (100 MHz) of 4-(4-fluorophenyl)-2,6-diphenylpyrimidine (3j):**

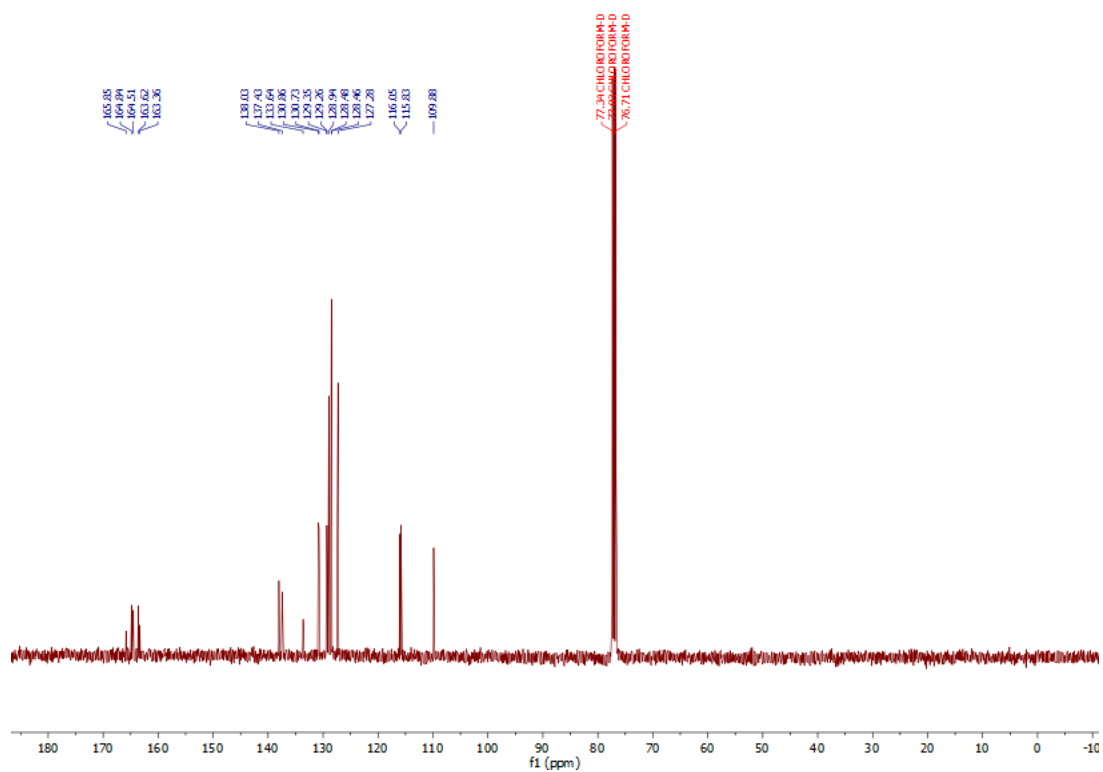

**<sup>1</sup>H NMR (400 MHz) of 4-(4-chlorophenyl)-2,6-diphenylpyrimidine (3k):**

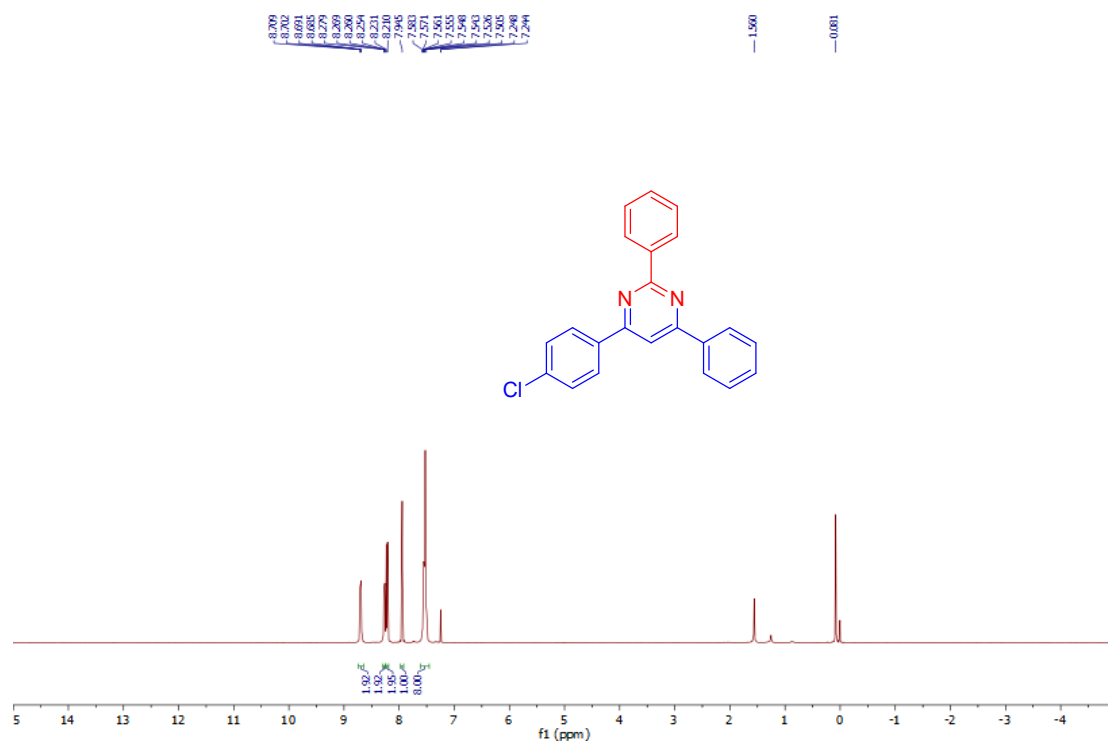

**<sup>13</sup>C NMR (100 MHz) of 4-(4-chlorophenyl)-2,6-diphenylpyrimidine (3k):**

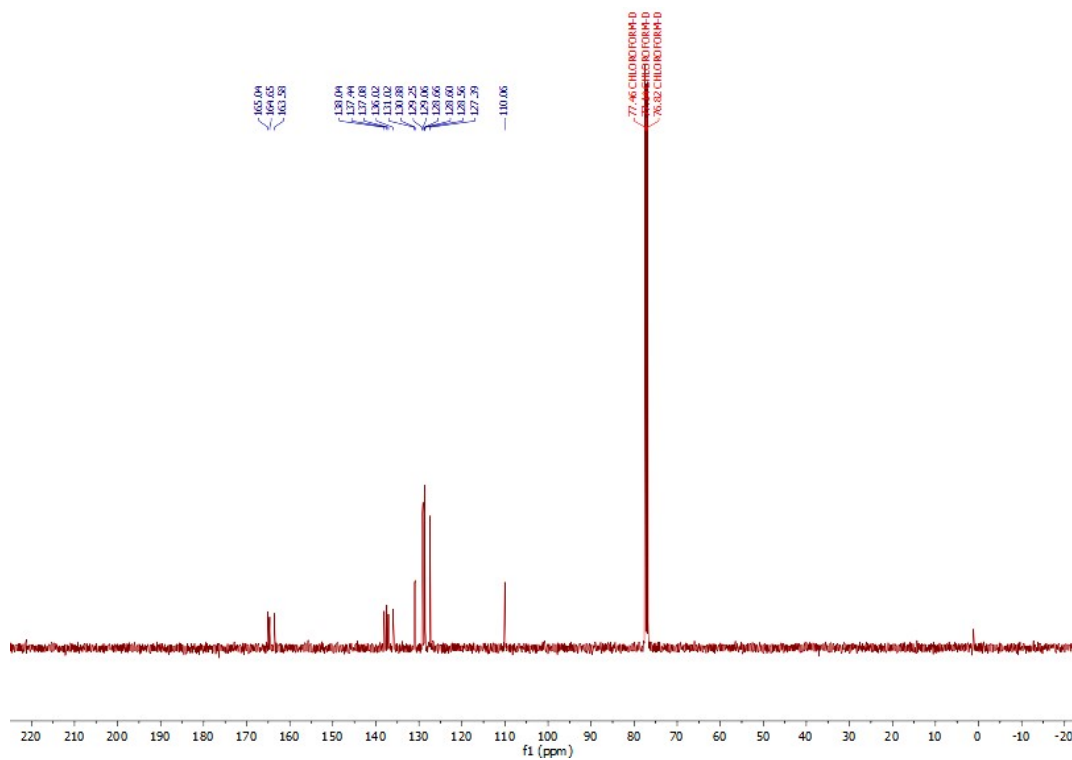





**<sup>1</sup>H NMR (400 MHz) of 2,4-diphenyl-6-(pyren-2-yl) pyrimidine (3n):**

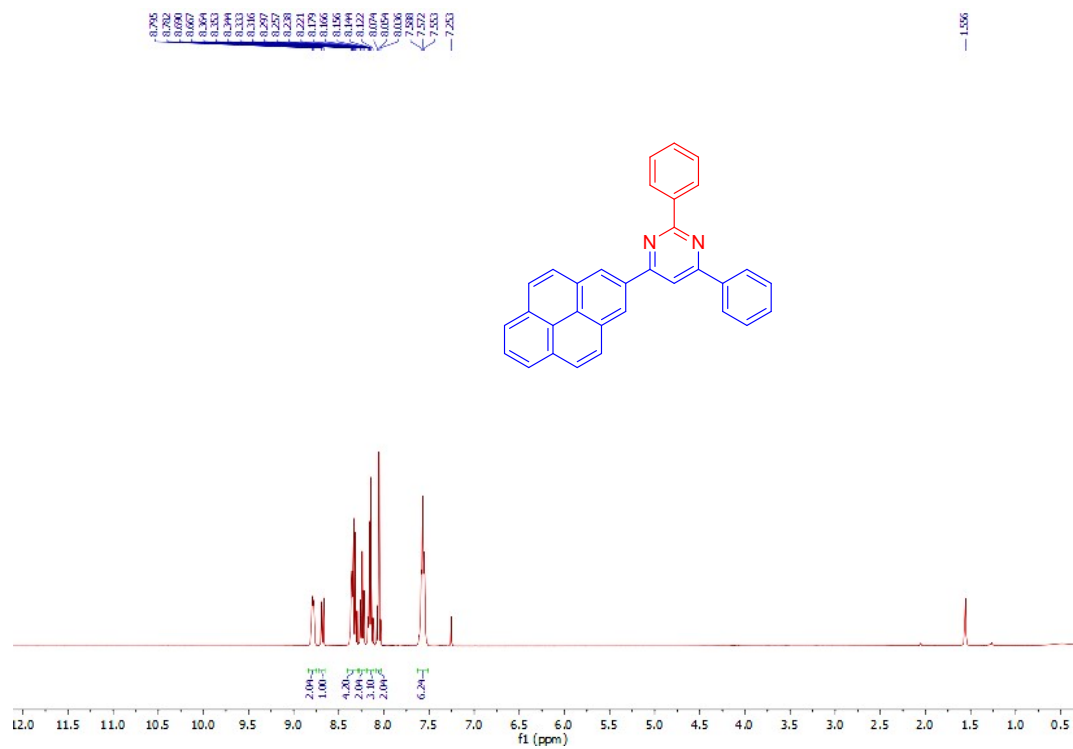

**<sup>13</sup>C NMR (100 MHz) of 2,4-diphenyl-6-(pyren-2-yl) pyrimidine (3n):**

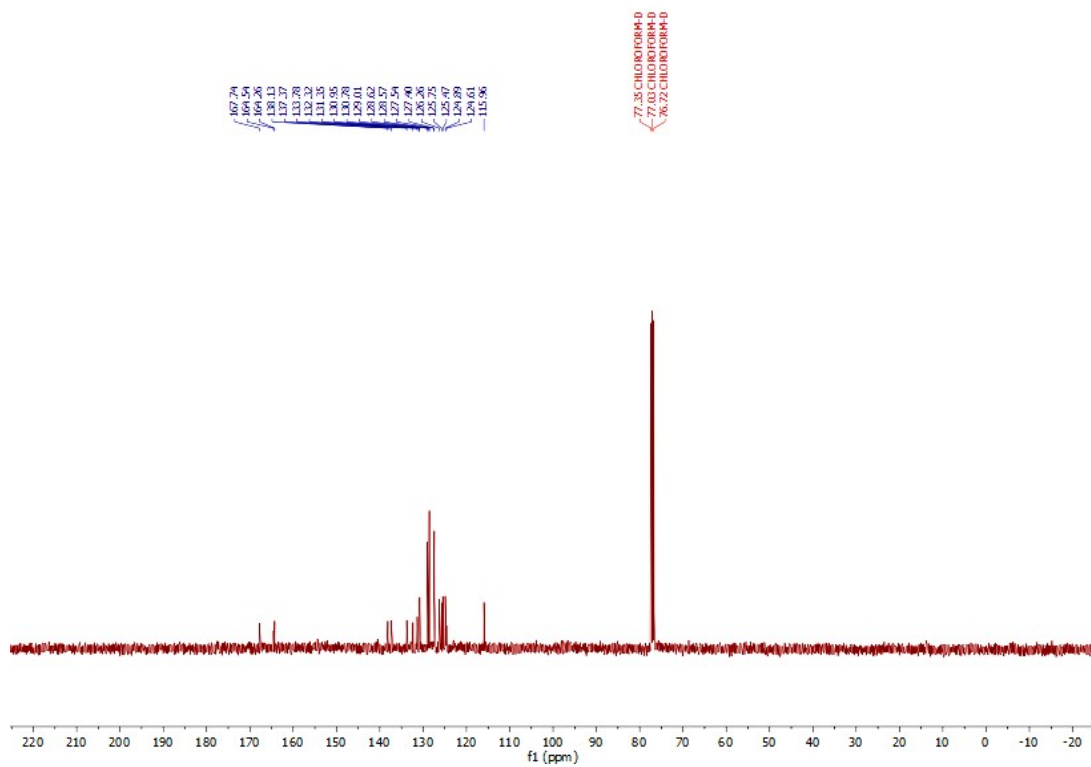



**<sup>1</sup>H NMR (400 MHz) of 2-phenyl-4-(pyren-2-yl)-6-(p-tolyl) pyrimidine (3o):**

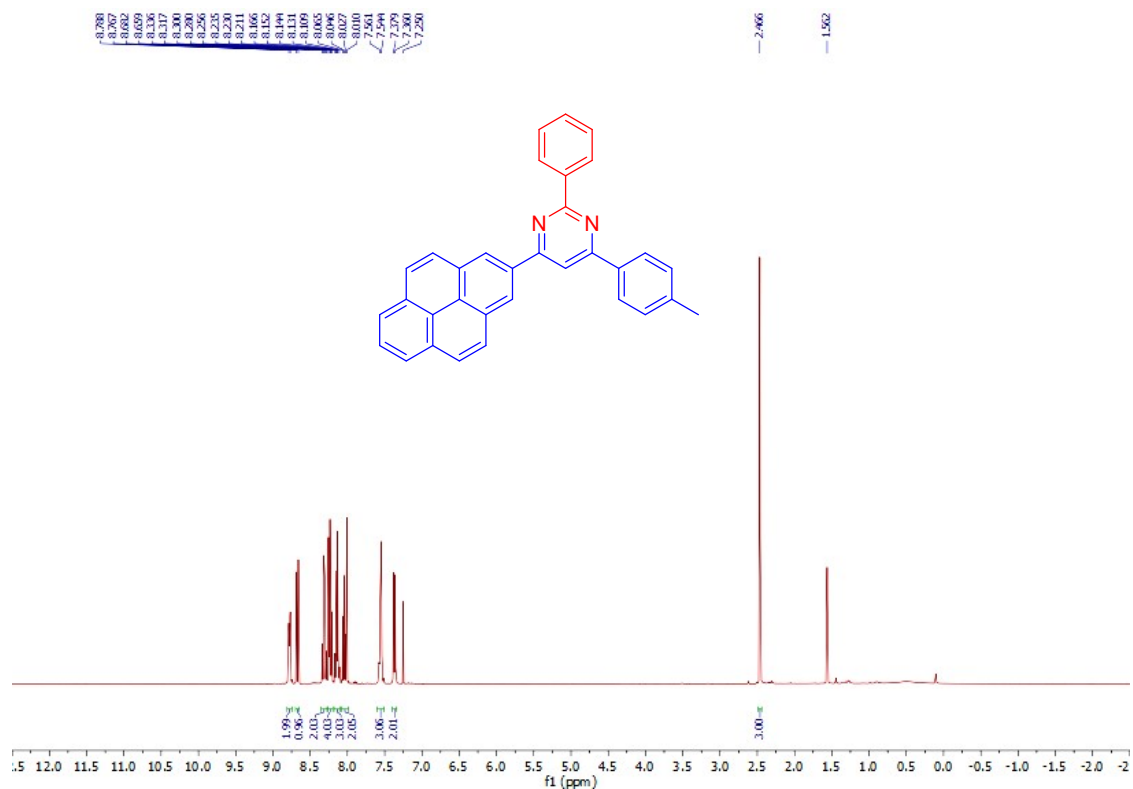

**<sup>13</sup>C NMR (100 MHz) of 2-phenyl-4-(pyren-2-yl)-6-(p-tolyl) pyrimidine (3o):**

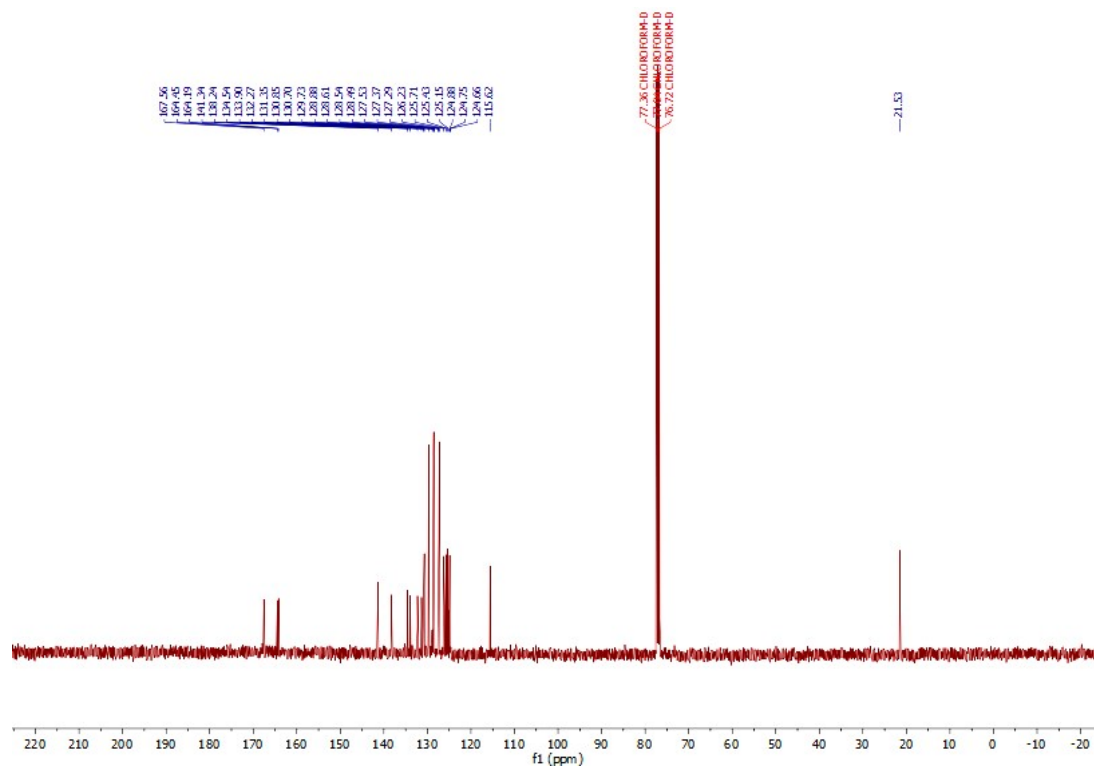

**<sup>1</sup>H NMR (400 MHz) of 2,4-diphenyl-6-(p-tolyl)pyrimidine (3p):**

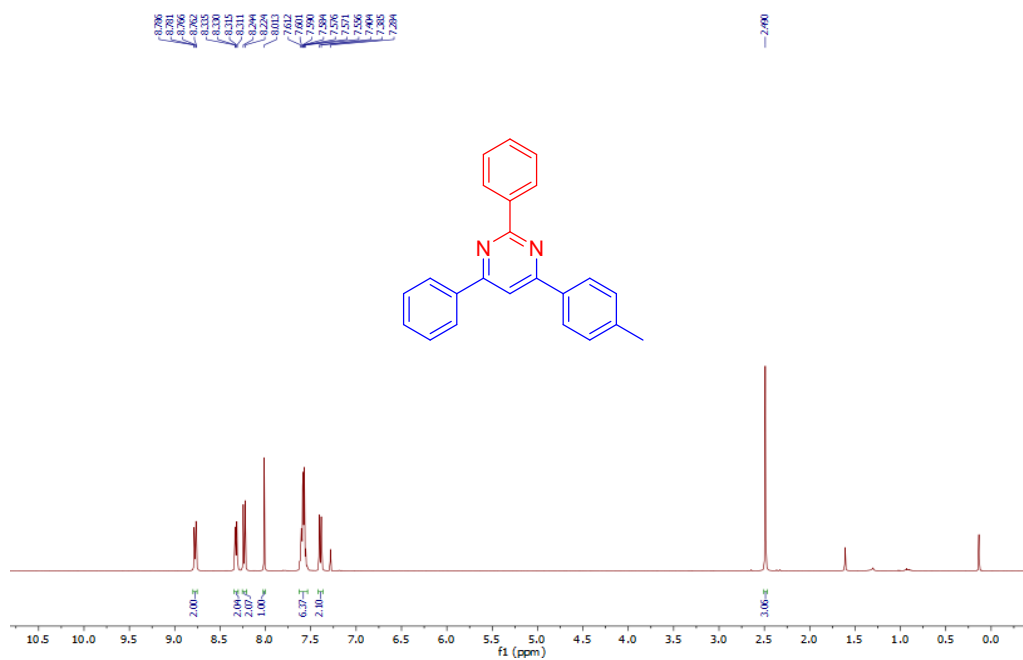

**<sup>13</sup>C NMR (100 MHz) of 2,4-diphenyl-6-(p-tolyl)pyrimidine (3p):**

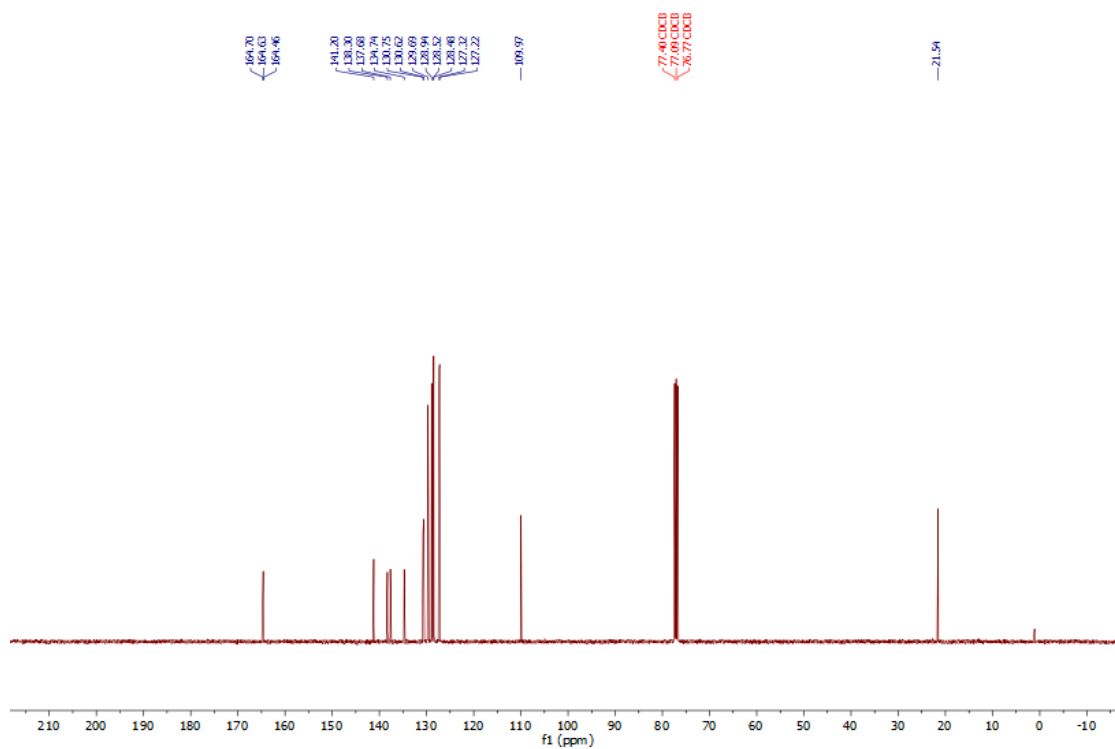

**<sup>1</sup>H NMR (400 MHz) of 2,4-diphenyl-6-propylpyrimidine (3q):**

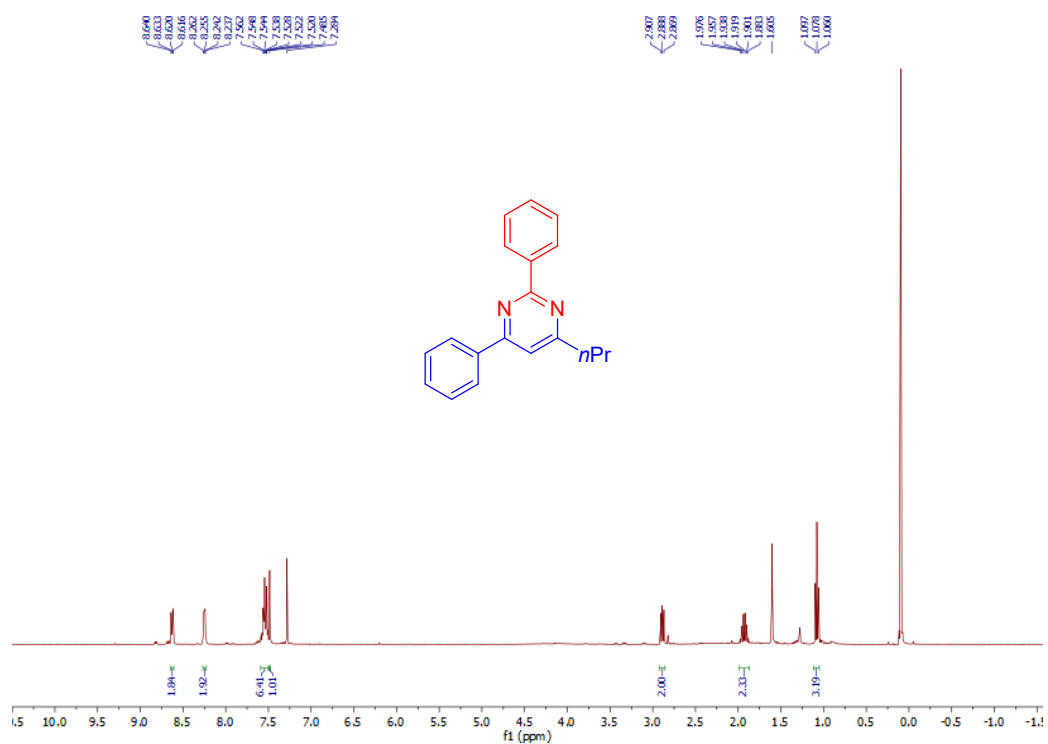

**<sup>13</sup>C NMR (100 MHz) of 2,4-diphenyl-6-propylpyrimidine (3q):**

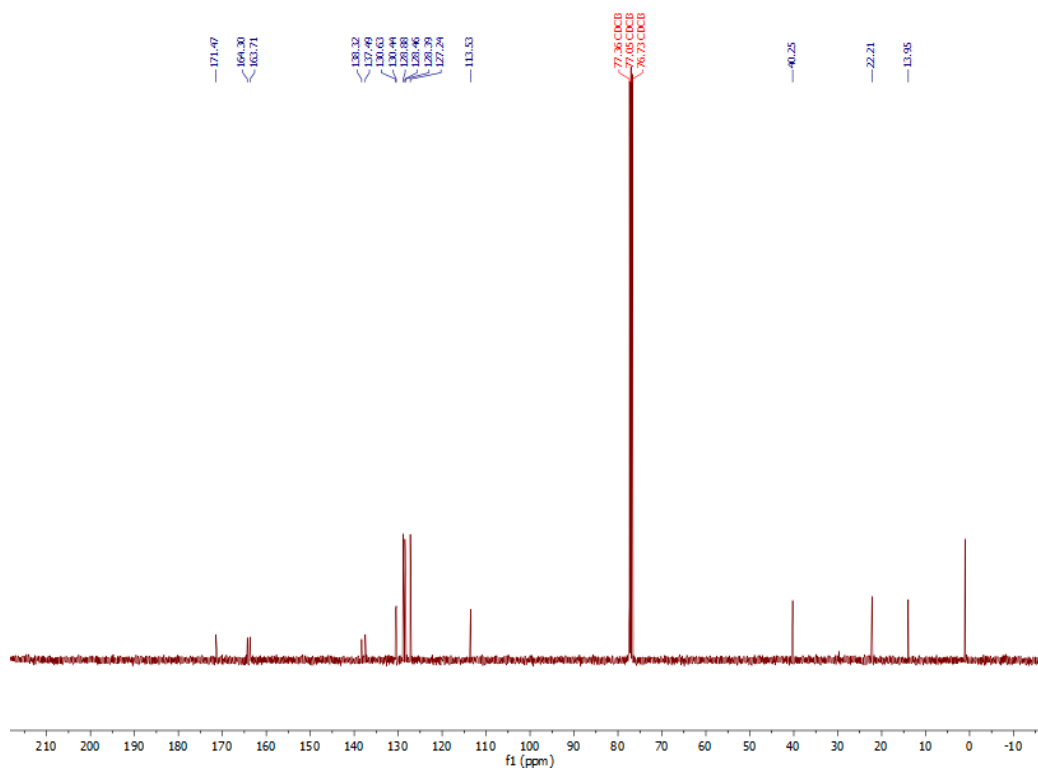

**<sup>1</sup>H NMR (400 MHz) of 2-cyclopropyl-4,6-diphenylpyrimidine (3r):**

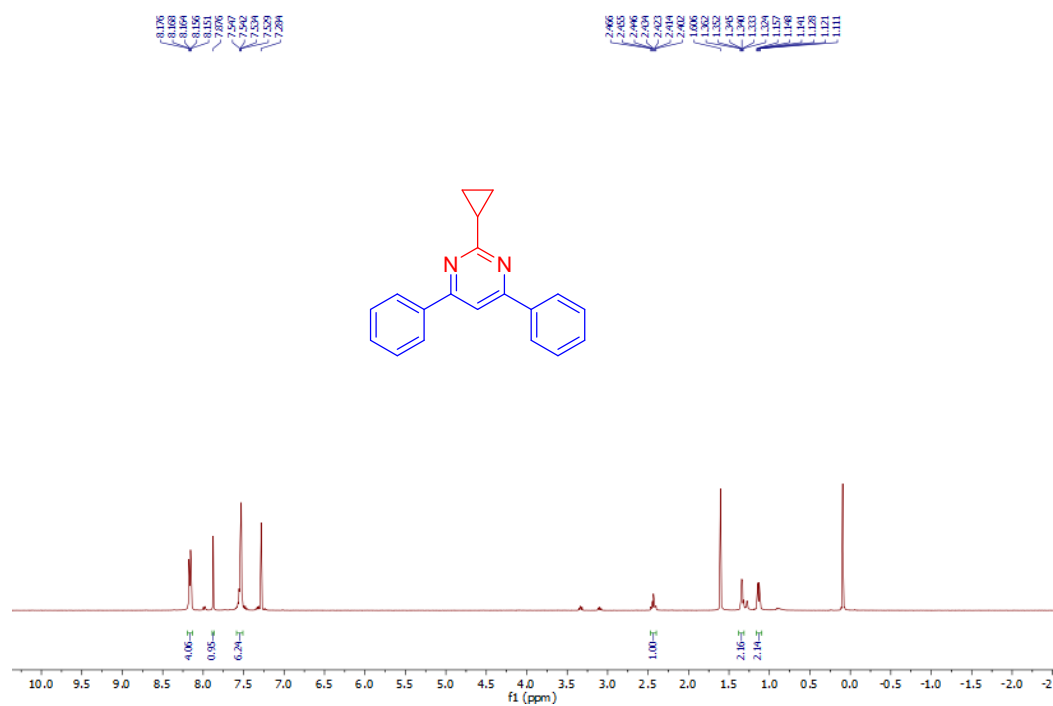

**<sup>13</sup>C NMR (100 MHz) of 2-cyclopropyl-4,6-diphenylpyrimidine (3r):**

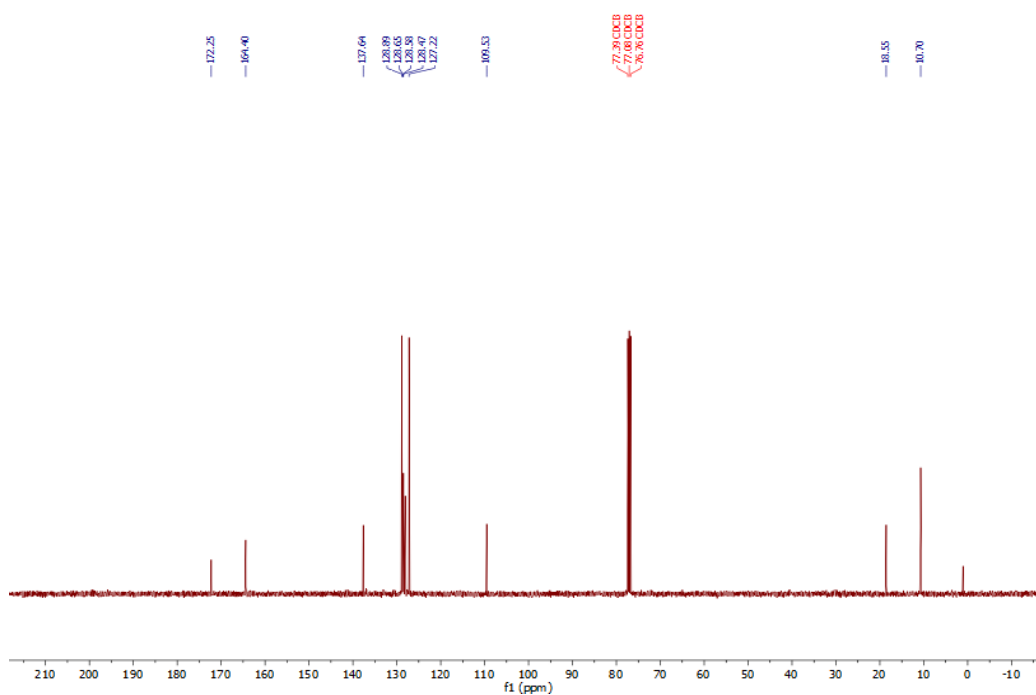

**<sup>1</sup>H NMR (400 MHz) of 4-(4,6-diphenylpyrimidin-2-yl)aniline (3s):**

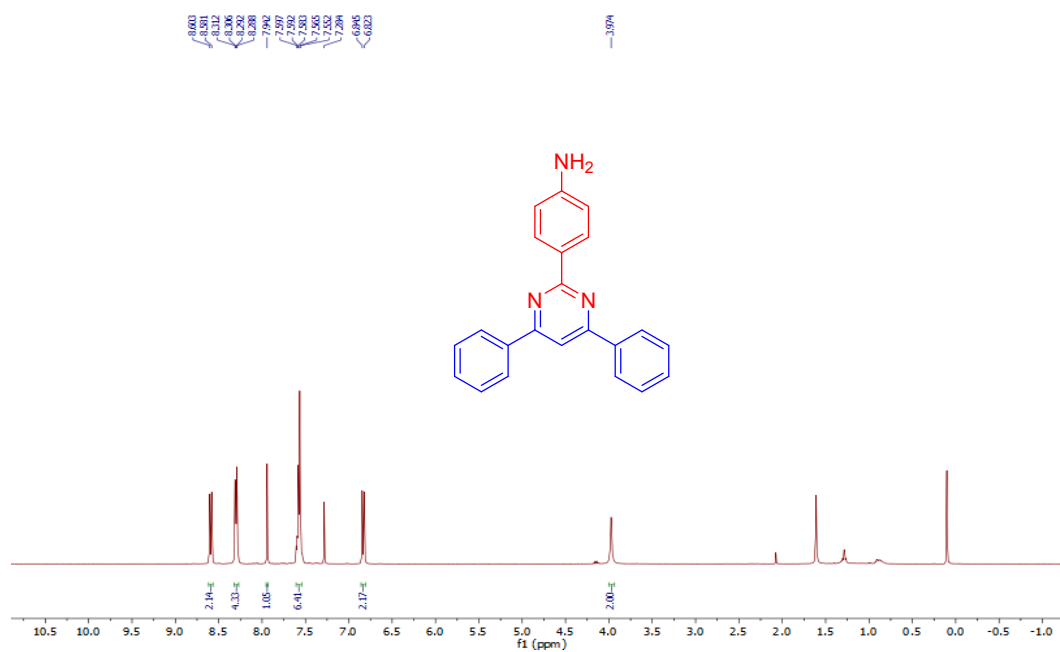

**<sup>13</sup>C NMR (100 MHz) of 4-(4,6-diphenylpyrimidin-2-yl)aniline (3s):**

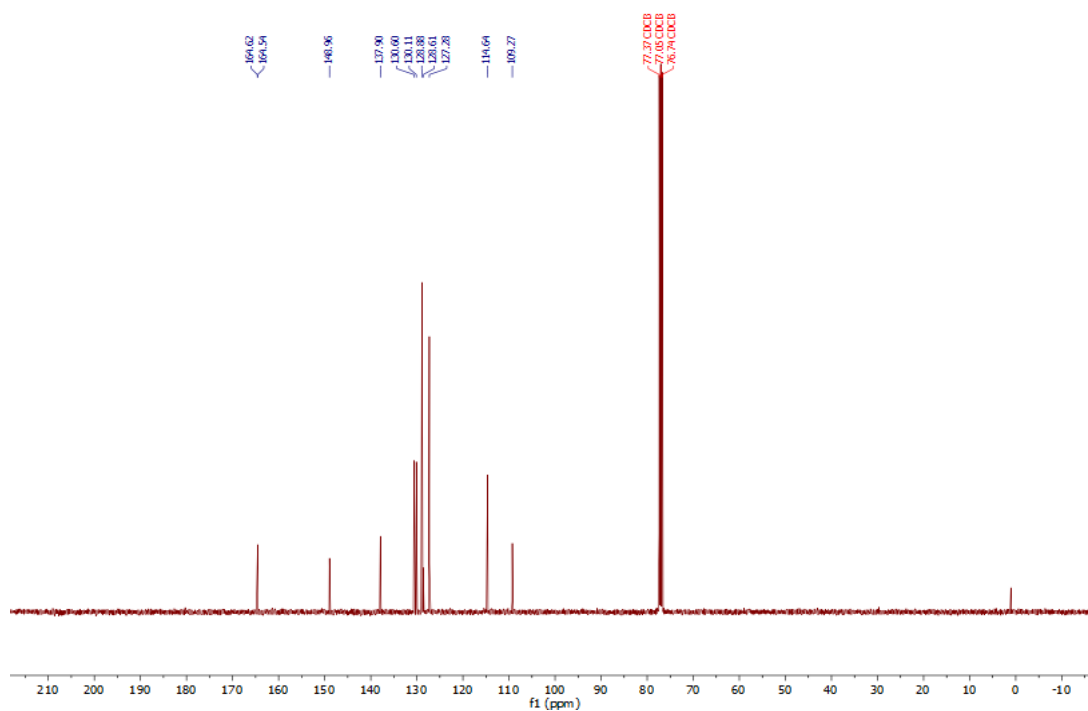

**<sup>1</sup>H NMR (400 MHz) of 2-(4-chlorophenyl)-4,6-diphenylpyrimidine (3t):**

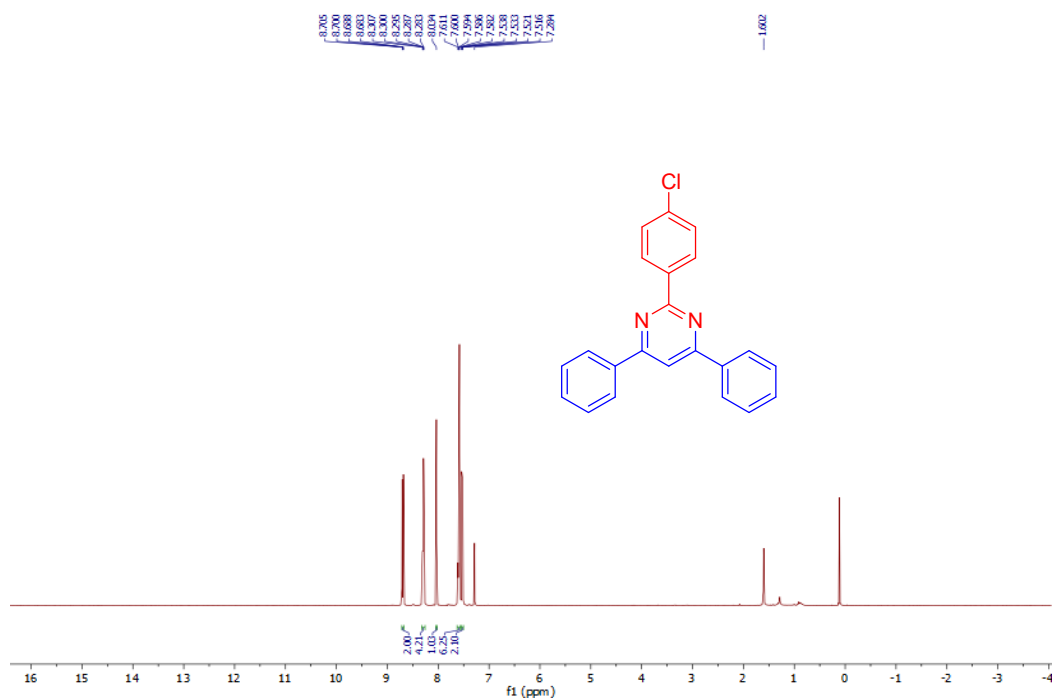

**<sup>13</sup>C NMR (100 MHz) of 2-(4-chlorophenyl)-4,6-diphenylpyrimidine (3t):**

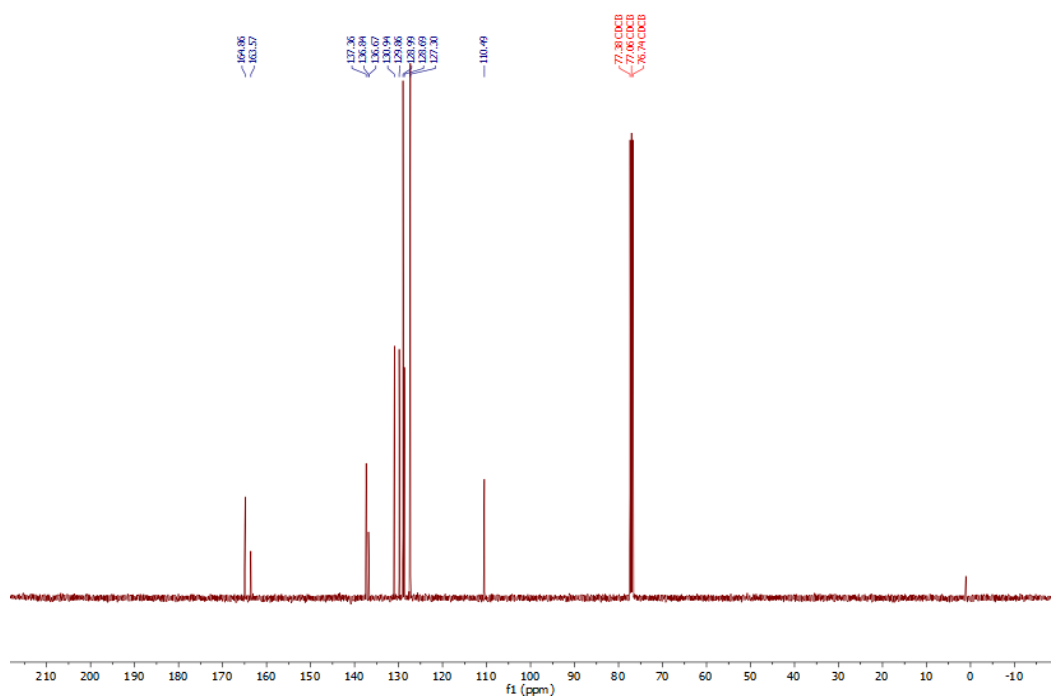

**<sup>1</sup>H NMR (400 MHz) of 4,6-diphenylpyrimidin-2-amine (5a):**

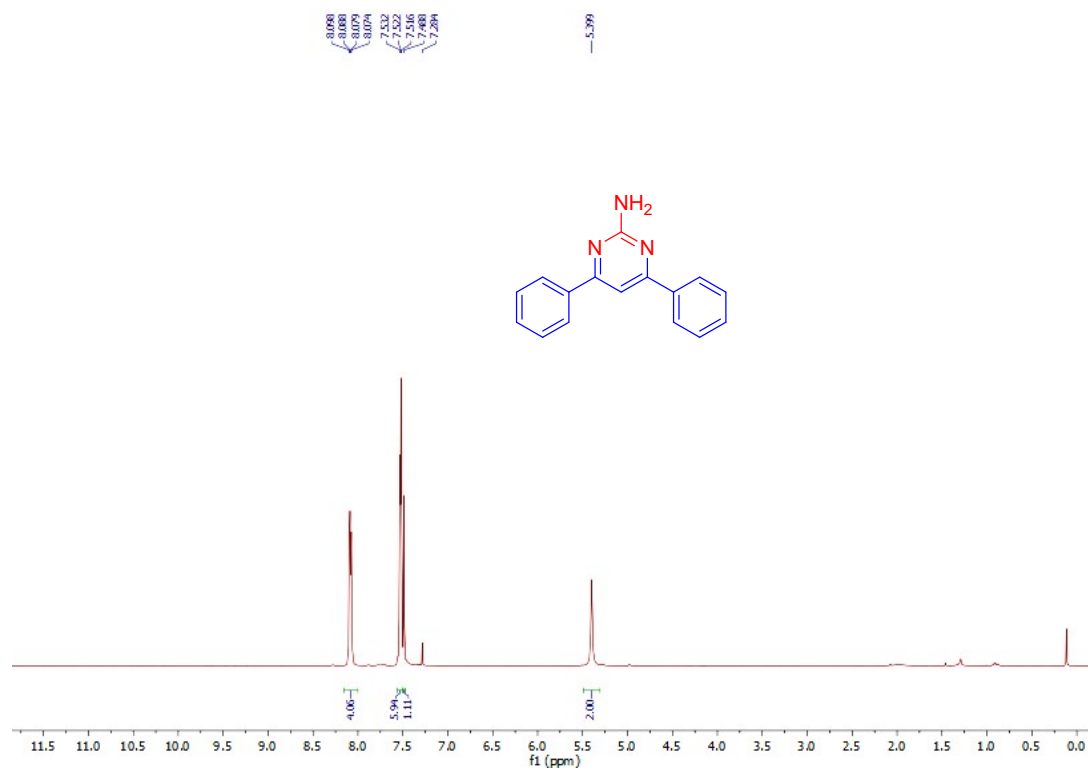

**<sup>13</sup>C NMR (100 MHz) of 4,6-diphenylpyrimidin-2-amine (5a):**

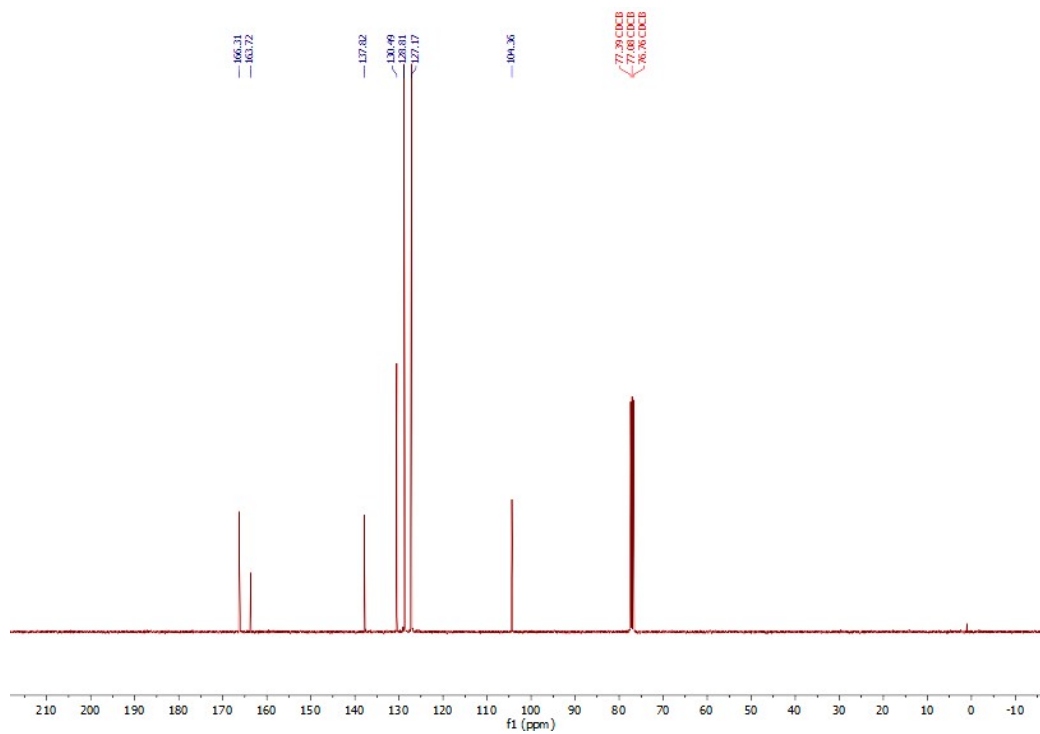

**<sup>1</sup>H NMR (400 MHz) of 4-phenyl-6-(o-tolyl)pyrimidin-2-amine (5b):**

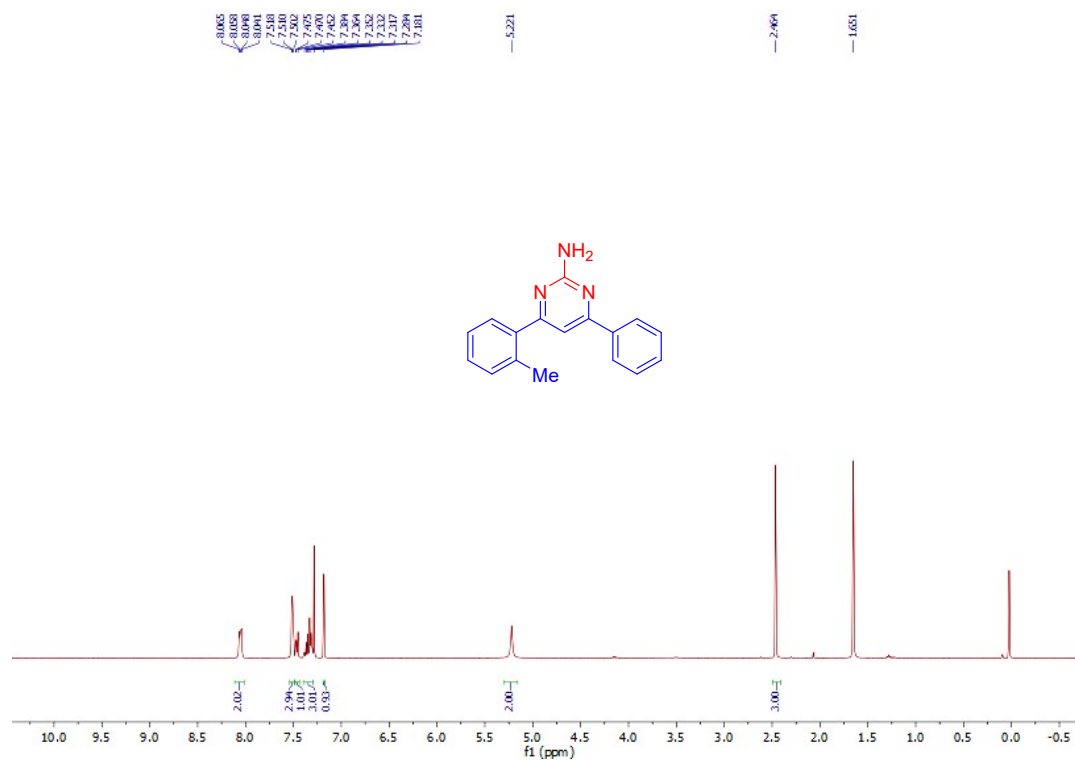

**<sup>13</sup>C NMR (100 MHz) of 4-phenyl-6-(o-tolyl) pyrimidin-2-amine (5b):**

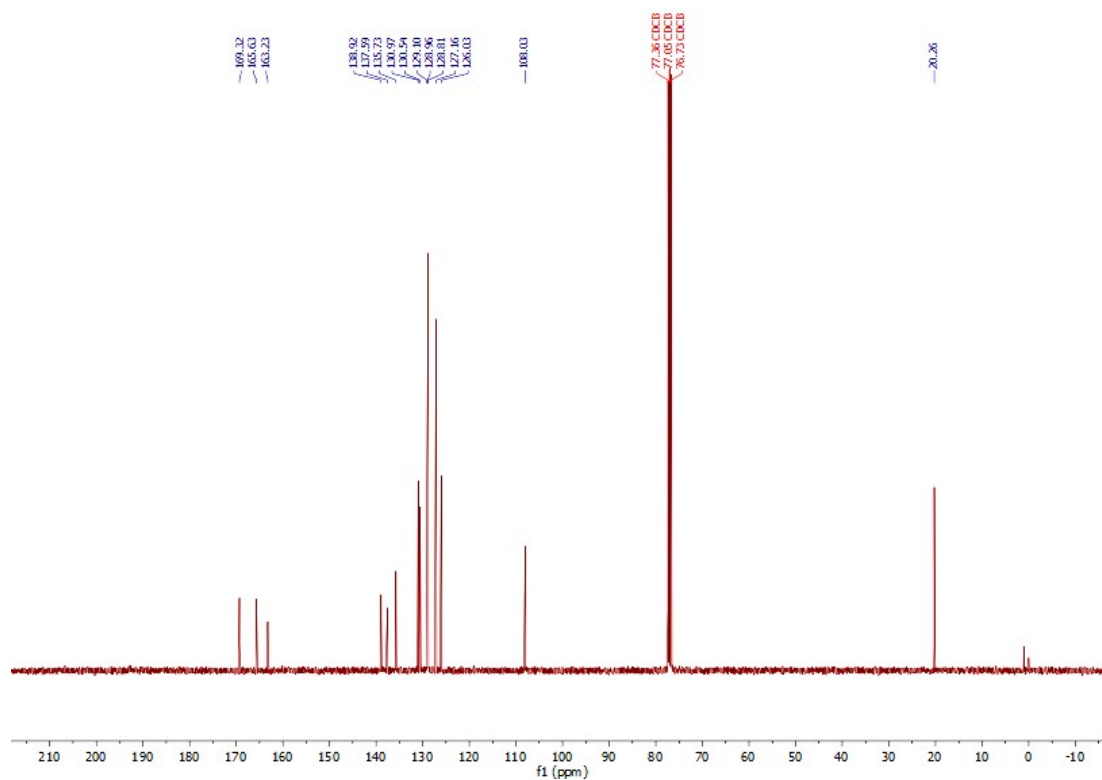



**<sup>1</sup>H NMR (400 MHz) of 4-(4-ethylphenyl)-6-phenylpyrimidin-2-amine (5c):**

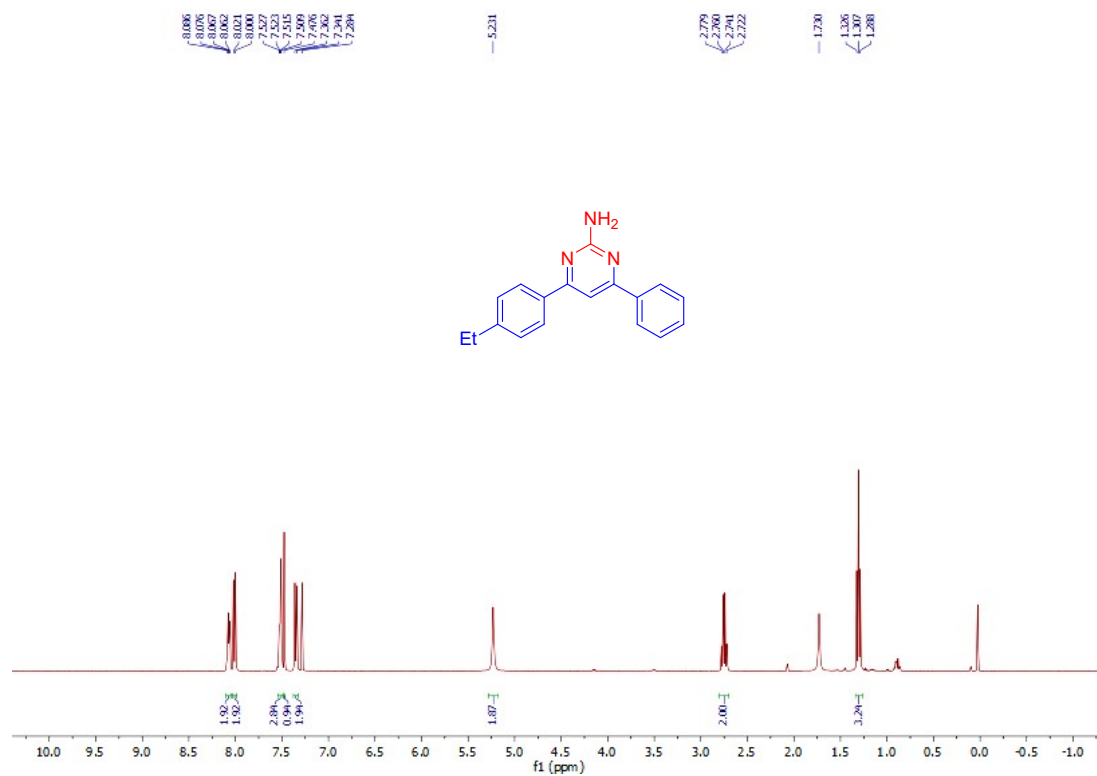

**<sup>13</sup>C NMR (100 MHz) of 4-(4-ethylphenyl)-6-phenylpyrimidin-2-amine (5c):**

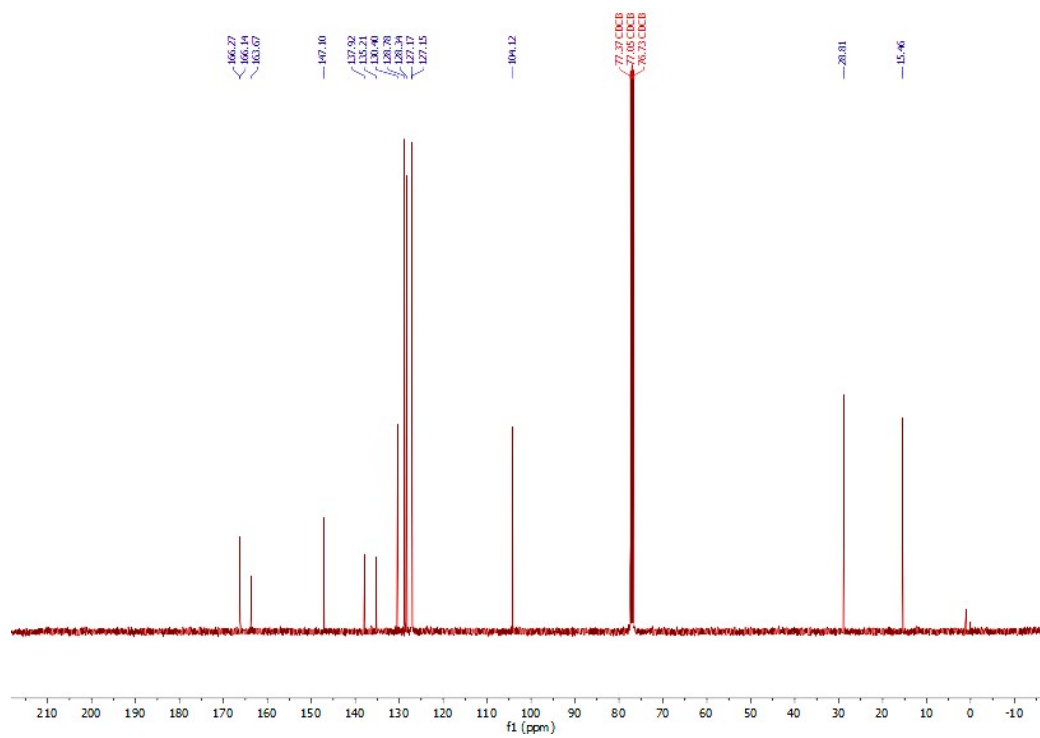

**<sup>1</sup>H NMR (400 MHz) of 4-(4-methoxyphenyl)-6-phenylpyrimidin-2-amine (5d):**

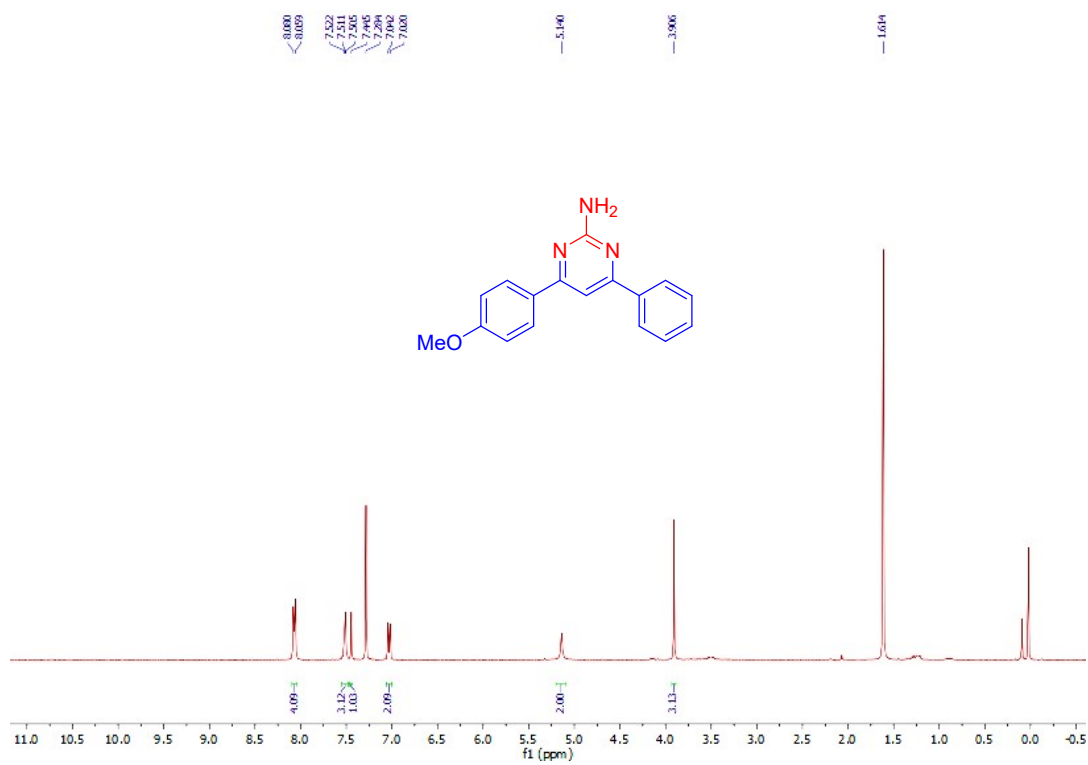

**<sup>13</sup>C NMR (100 MHz) of 4-(4-methoxyphenyl)-6-phenylpyrimidin-2-amine (5d):**

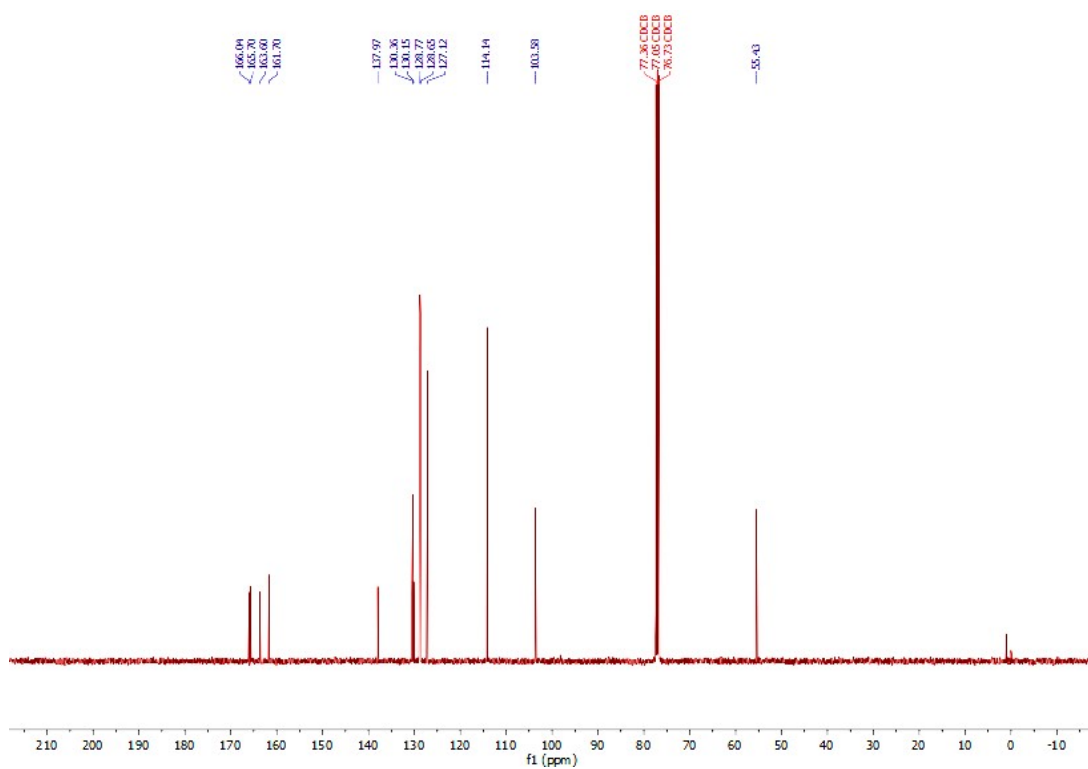

**<sup>1</sup>H NMR (400 MHz) of 4-(2,5-dimethoxyphenyl)-6-phenylpyrimidin-2-amine (5e):**

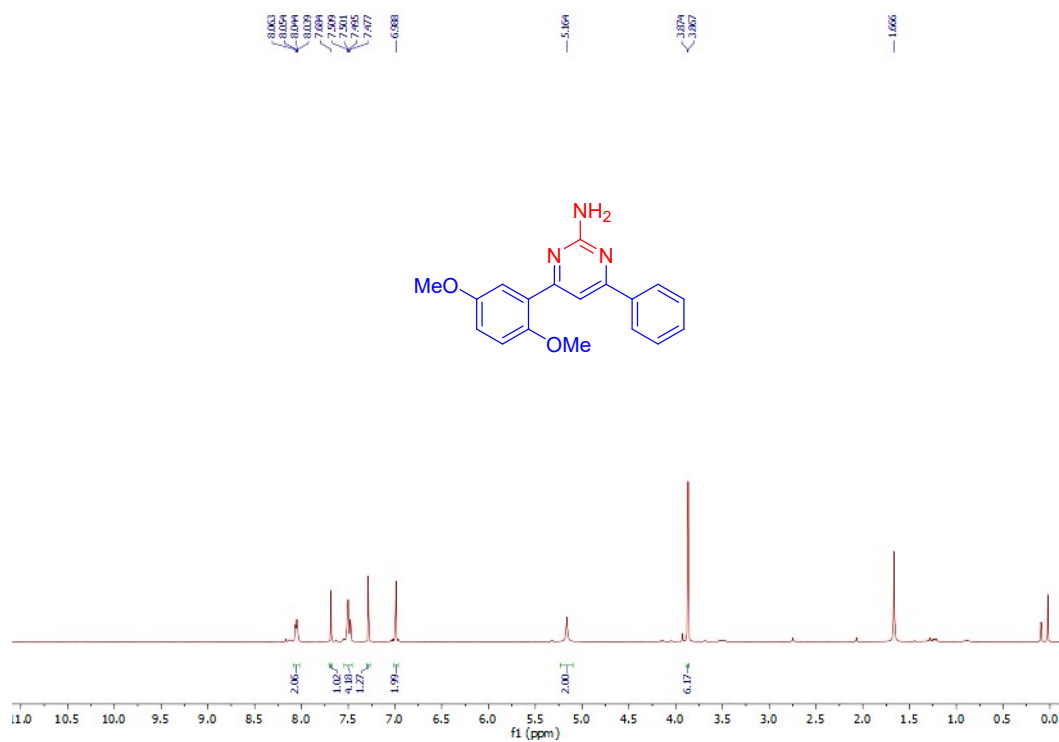

**<sup>13</sup>C NMR (100 MHz) of 4-(2,5-dimethoxyphenyl)-6-phenylpyrimidin-2-amine (5e):**

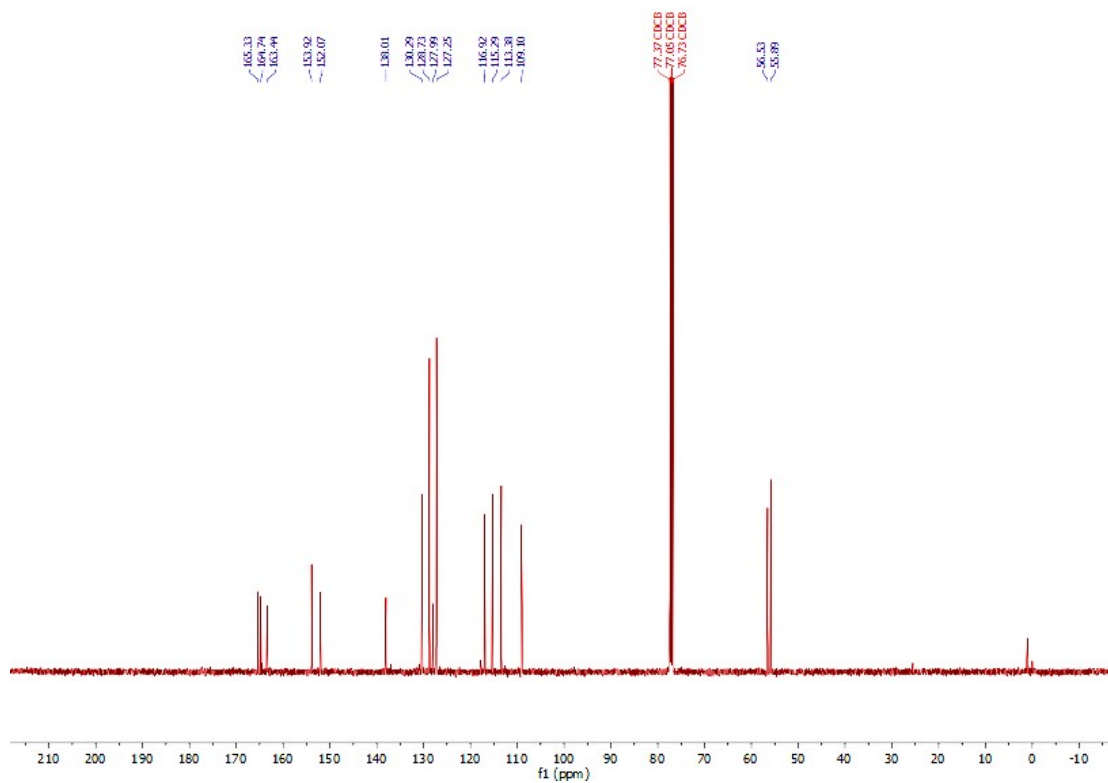

**<sup>1</sup>H NMR (400 MHz) of 4-(4-chlorophenyl)-6-phenylpyrimidin-2-amine (5f):**

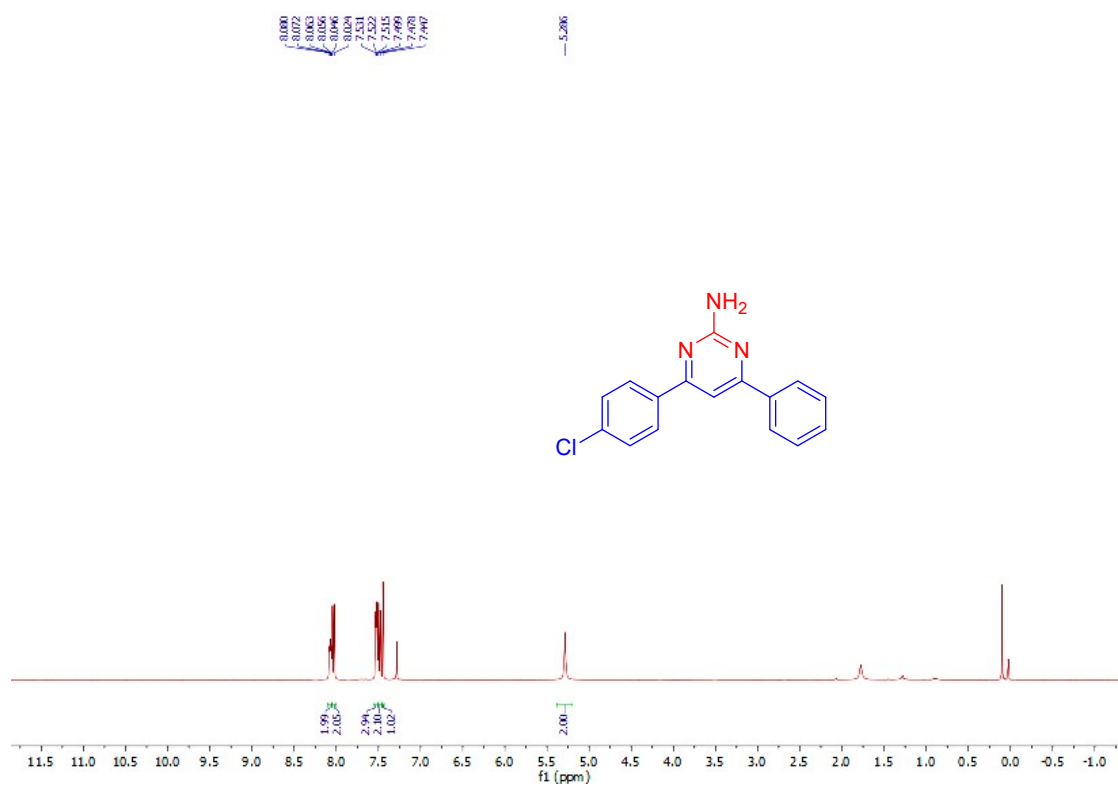

**<sup>13</sup>C NMR (100 MHz) of 4-(4-chlorophenyl)-6-phenylpyrimidin-2-amine (5f):**

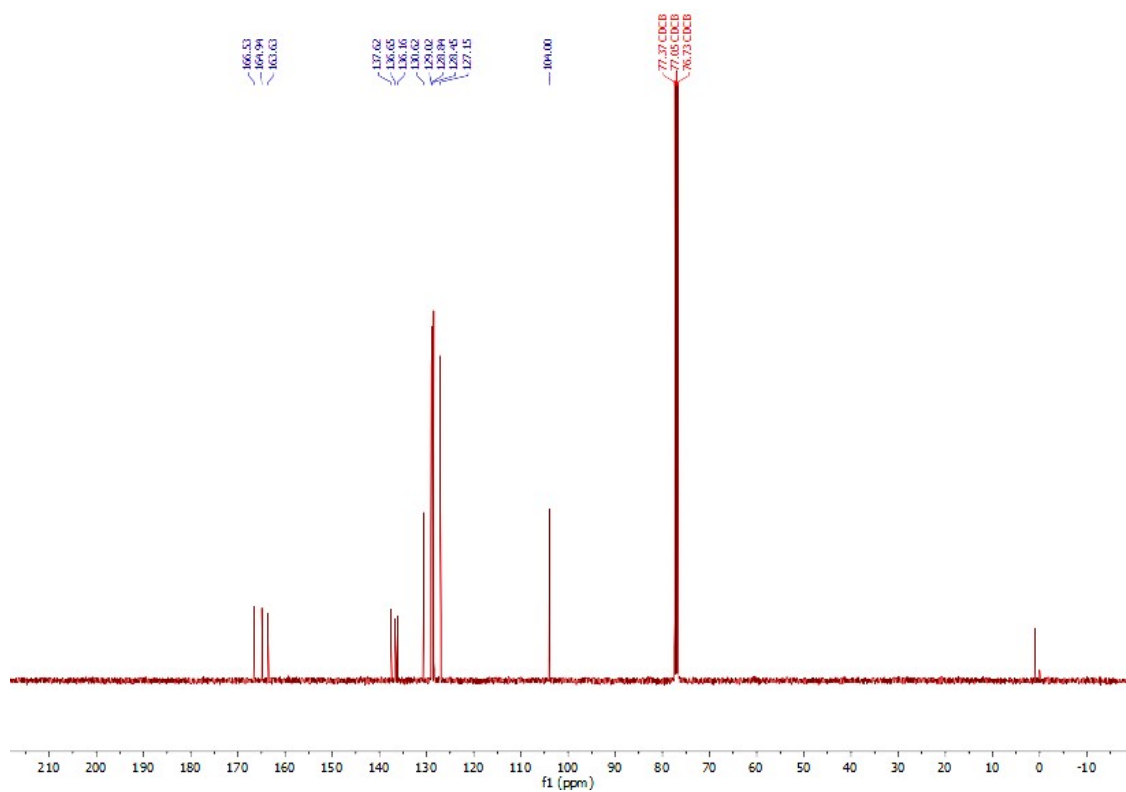

### Crystallographic data analysis of compound **3o**:

We have attempted for crystallization of some compound and we have got crystal from compound **3o** in ethyl acetate-hexane solvent mixture by slow evaporation. A yellow colored, needle shaped crystal was obtained. The single-crystal X-ray diffraction (SC-XRD) at low temperature indicates the triclinic system with space group P-1. The crystallographic details are given in table 3.

Table 3. Crystallographic details of **3o**

| Parameters                                  | Compound <b>3o</b>                             |
|---------------------------------------------|------------------------------------------------|
| <b>Formula</b>                              | C <sub>33</sub> H <sub>22</sub> N <sub>2</sub> |
| <b>Formula Weight</b>                       | 446.53                                         |
| <b>Crystal System</b>                       | Triclinic                                      |
| <b>Space group</b>                          | P1                                             |
| <b>a (Å)</b>                                | 8.036 (1)                                      |
| <b>b(Å)</b>                                 | 10.55(2)                                       |
| <b>c (Å)</b>                                | 13.26(3)                                       |
| <b>α(°)</b>                                 | 93.56(5)                                       |
| <b>β(°)</b>                                 | 96.81(4)                                       |
| <b>γ(°)</b>                                 | 94.96(5)                                       |
| <b>V (Å<sup>3</sup>)</b>                    | 1109(4)                                        |
| <b>Z</b>                                    | 2                                              |
| <b>D(calc) (g.cm<sup>-3</sup>)</b>          | 1.337                                          |
| <b>μ Mo K<sub>α</sub> (mm<sup>-1</sup>)</b> | 0.078                                          |
| <b>F (000)</b>                              | 468.0                                          |
| <b>Temperature (K)</b>                      | 297                                            |
| <b>Radiation Mo K<sub>α</sub> (Å)</b>       | 0.71073                                        |
| <b>θMax (°)</b>                             | 25.213                                         |
| <b>Nref, Npar</b>                           | 4012, 318                                      |
| <b>R, wR2, S</b>                            | 0.0805(3031),<br>0.2891(3989), 1.127           |
| <b>CCDC No.</b>                             | 2087550                                        |
